# Supplementary material for: Zebrafish Model for Functional Screening of Flow-Responsive Genes
Source: PubMed Central journal article supplement (PMC5172514; doi:10.1161/atvbaha.116.308502), 2016-12-21
Supplement: atv-37-130-s001.pdf [file atv-37-130-s001.pdf]

## **SUPPLEMENTAL MATERIAL**

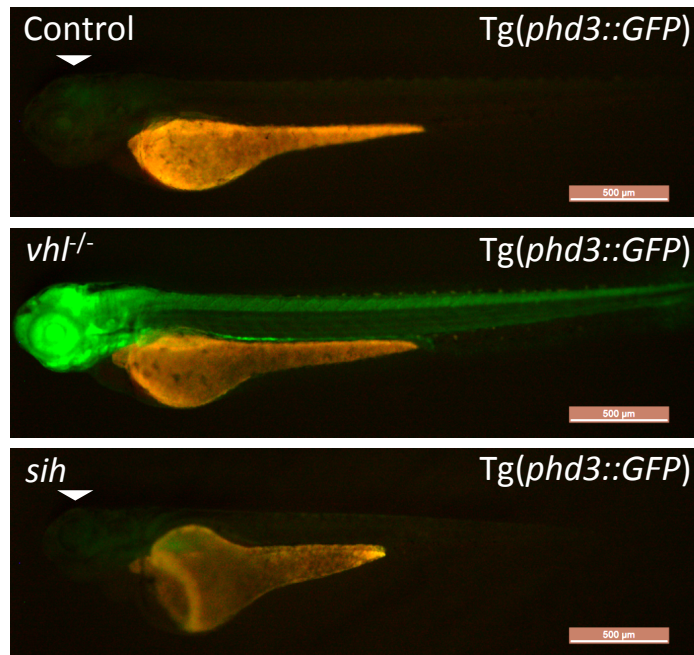

**Supplemental Fig. 1**

**Silent heart embryos do not exhibit hypoxia.** The hypoxic response was monitored in transgenic embryos containing a hypoxia reporter *Tg(phd3::GFP)*. Embryos deficient in von Hippel-Lindau (*vhl*) tumour suppressor gene expression were used as a positive control. *Vhl*<sup>-/-</sup> embryos exhibit a systemic hypoxic response, reflected by upregulation of GFP expression. No upregulation of GFP expression was observed in *sih* embryos lacking blood flow compared to controls. White arrowheads indicate mild GFP fluorescence in the brain region. Lateral view of 3 day old embryos.

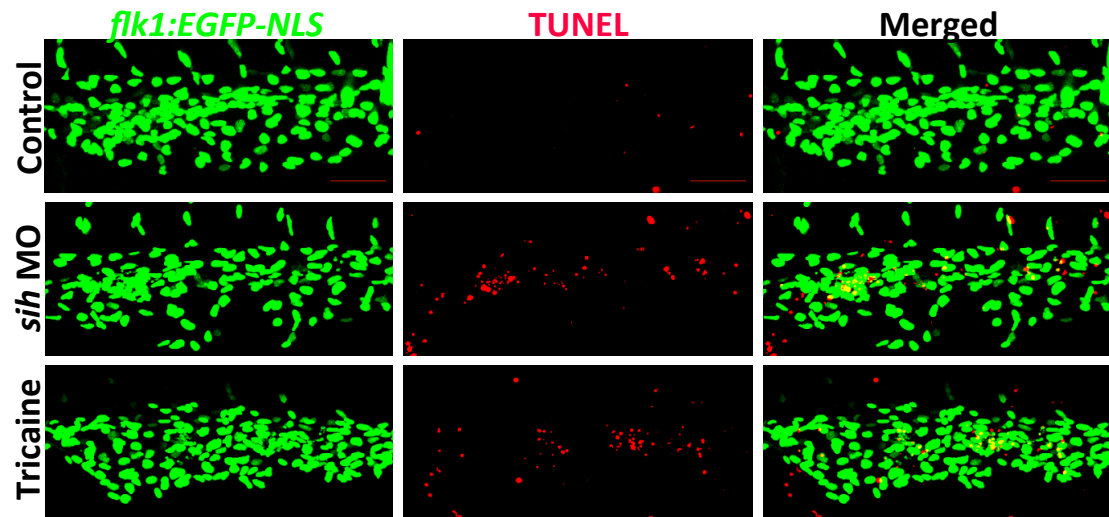

**Supplemental Fig. II**

**Flow cessation induces EC DNA fragmentation in zebrafish embryos at 30 hpf.** Whole-mount TUNEL staining (red) of 30 hpf *flk1:EGFP-NLS* embryos (green EC nuclei) in the presence (control) or absence of flow (*sih* MO, tricaine). Lateral view, anterior to the left, dorsal up. Scale bar: 50  $\mu$ m.

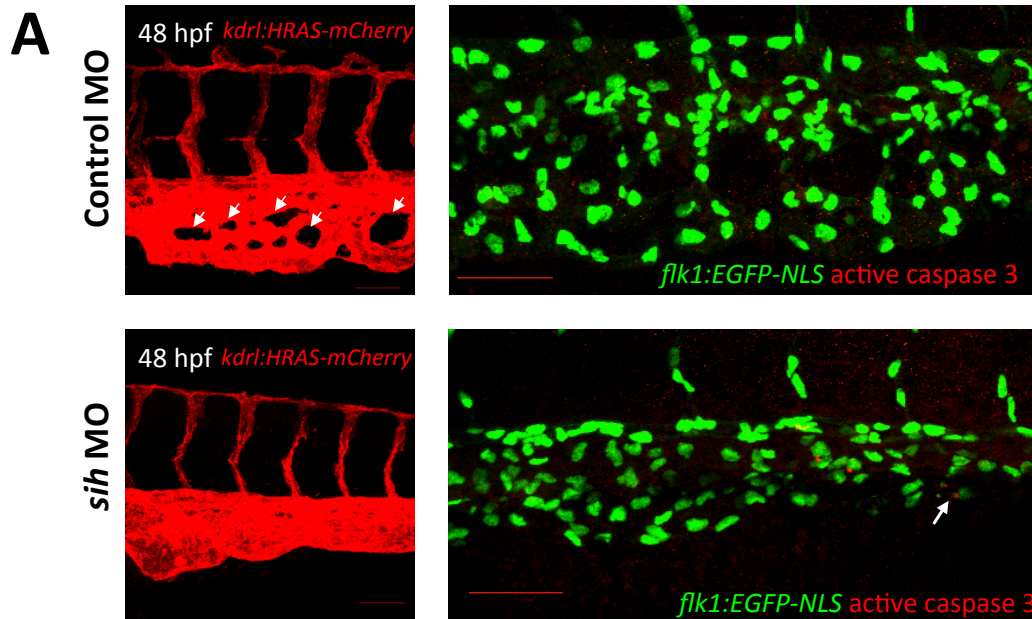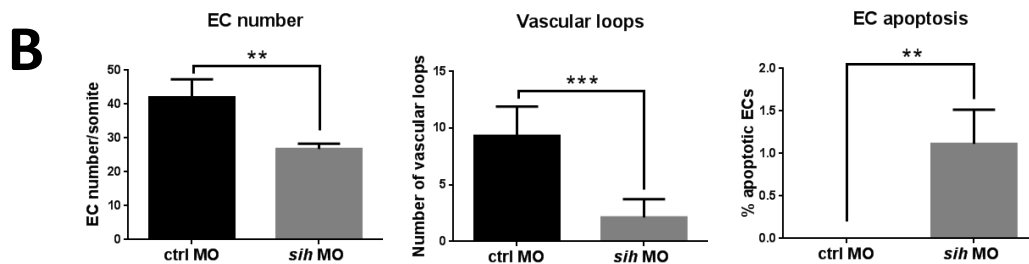

### Supplemental Fig III

**Flow cessation reduces the complexity of the caudal plexus in zebrafish embryos at 48 hpf.** Whole-mount active caspase-3 staining (red) of 48 hpf *flk1:EGFP-NLS* embryos (green EC nuclei) and assessment of vascular morphology of 48 hpf *kdrl:HRAS-mCherry* (red EC) embryos in the presence (control) or absence of flow (*sih* MO). (A) Representative images are shown. Caudal vein plexus morphology was less complex and with fewer loops (indicated with white arrows) in the absence of flow (*sih* MO) compared to controls (left panels). A modest increase in apoptotic EC was observed in *sih* MO compared to controls (right panels). (B) EC numbers, number of vascular loops and percentage of apoptotic ECs were quantified in *sih* embryos and controls at 48 hpf and are presented as mean values with standard deviation.  $n \geq 15$  from three independent experiments; \*\* $p < 0.01$ , \*\*\* $p < 0.001$  using an unpaired two-tailed t-test.



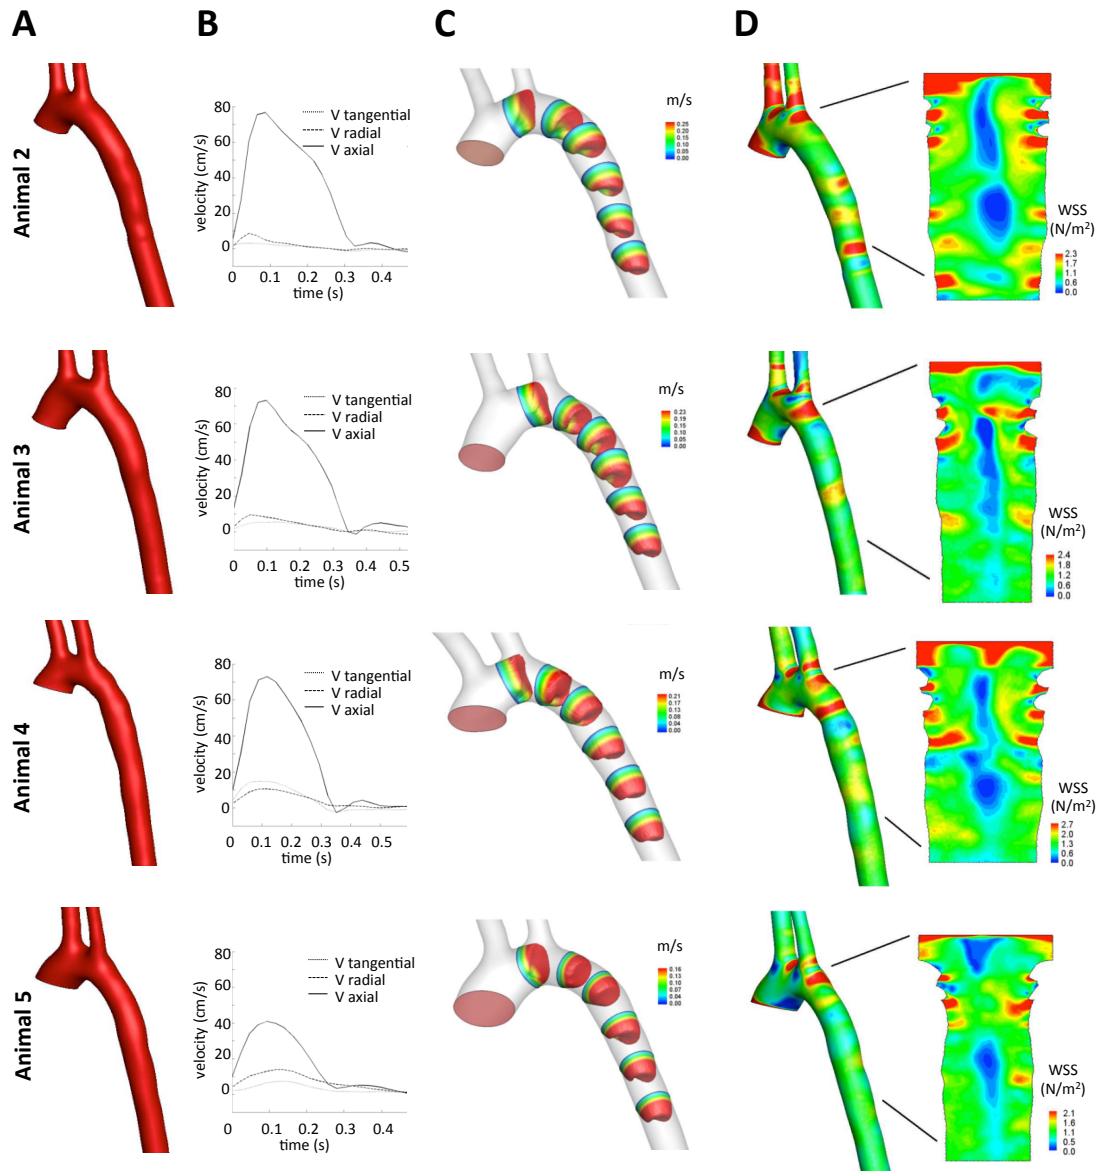

### Supplemental Fig IV

#### Steady state fluid dynamics in the porcine aorta: variation between animals.

Steady state fluid dynamics were studied in the aortae of pigs using MR imaging and CFD. (A) The surfaces of the aortic arch were reconstructed from MR images, smoothed with a low-pass filter and extended with cylindrical flow extensions at the outlets. (B) Velocity waveforms were acquired at the inlet section of the ascending aorta by phase contrast-MRI and post-processed in Matlab. The three components of the velocity in the local coordinate system are shown. (C) Three-dimensional velocity contours are shown over six representative planes. (D) A time-averaged WSS map was calculated and mapped onto the aortic geometry (left panel). The time-averaged WSS map was unwrapped via a computational incision over the outer aortic wall and the 2-dimensional WSS map was visualized with the endothelial layer facing upwards (right panel). High WSS is represented in red and low WSS in blue.

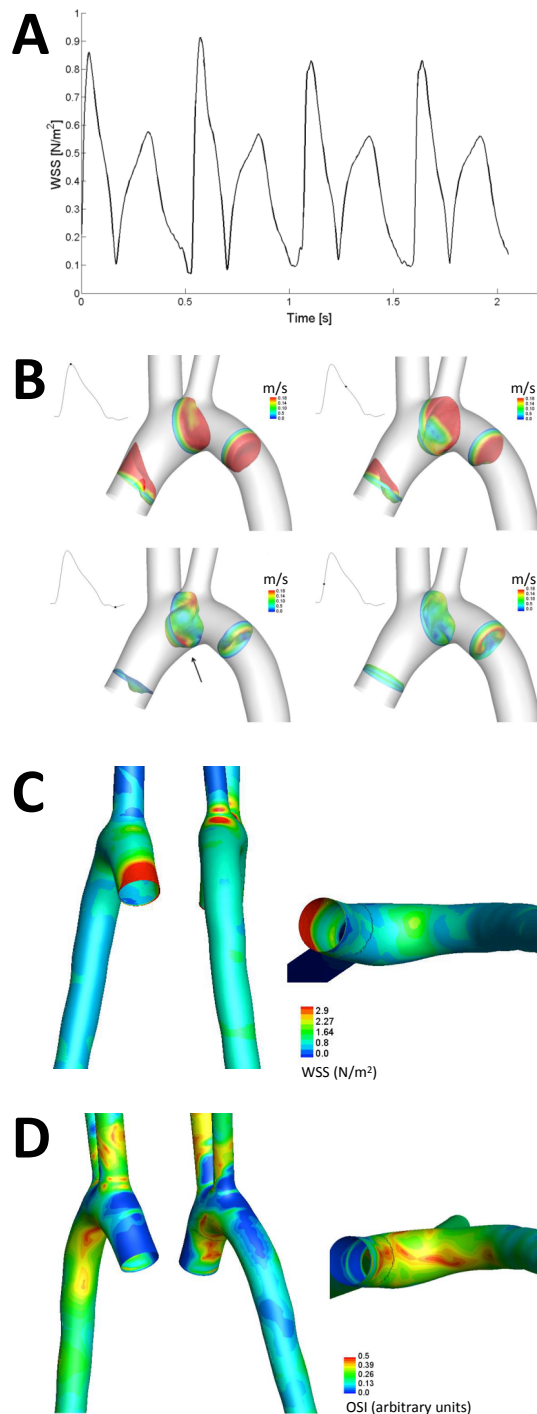

**Supplemental Fig V. Unsteady fluid dynamics in the porcine aorta.** Fluid dynamics in the porcine aorta were studied over the cardiac cycle using MR imaging and CFD. (A) Instantaneous WSS magnitudes were calculated for a single point on the inner curvature of the vessel during the first four cardiac cycles of simulated pulsatile flow. (B) Velocity profiles are shown for four representative points of the cardiac cycle for a porcine aortic arch. The arrow indicates peak retrograde flow in diastole at the inner curvature of the arch. (C) Time-averaged WSS (TAWSS) distribution at the porcine aortic arch, depicted at three different views. High TAWSS is represented in red and low TAWSS in blue. (D) Oscillatory Shear Index (OSI) distribution at the porcine aortic arch, depicted at three different views. Maximum OSI is highlighted in red and represents a 180° deflection of the WSS direction.

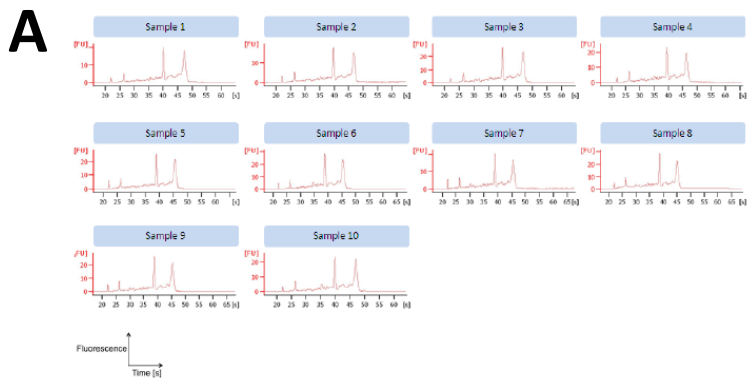

**B**

| Subject | Condition         | $A_{260/280}$ | Concentration [ng/ $\mu$ l] | 18s/28s | RIN |
|---------|-------------------|---------------|-----------------------------|---------|-----|
| Pig 1   | High shear stress | 1.98          | 20.7                        | 1.5     | 7.4 |
| Pig 1   | Low shear stress  | 1.9           | 21.7                        | 1.4     | 7.2 |
| Pig 2   | High shear stress | 2.03          | 29.4                        | 1.4     | 7.3 |
| Pig 2   | Low shear stress  | 1.88          | 22.3                        | 1.2     | 7.5 |
| Pig 3   | High shear stress | 2.01          | 24.4                        | 1.4     | 7.4 |
| Pig 3   | Low shear stress  | 2.17          | 39.1                        | 1.4     | 7.4 |
| Pig 4   | High shear stress | 1.92          | 24.9                        | 1.4     | 7.4 |
| Pig 4   | Low shear stress  | 1.94          | 40.6                        | 1.4     | 7   |
| Pig 5   | High shear stress | 1.96          | 19.6                        | 1.5     | 7.3 |
| Pig 5   | Low shear stress  | 1.96          | 19.6                        | 1.5     | 7.3 |

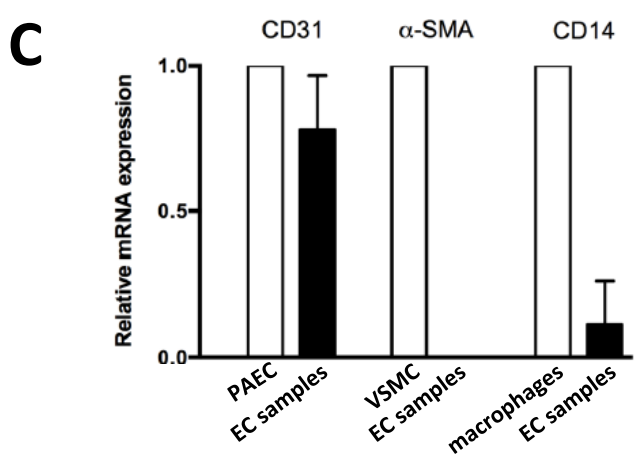

**Supplemental Fig VI. Quality control measures for RNA sampled from porcine aortic endothelium.** RNA was extracted from ECs at high and low WSS regions in 5 pigs. The purity and integrity of total RNA samples was assessed using a Bioanalyser (Agilent). (A) RNA electropherograms are presented for each sample. (B) Summary of the absorbance ratio 260 nm/ 280 nm ( $A_{260/280}$ ; a measure of RNA purity), concentration, ratio of 18s/28s ribosomal RNA levels and RNA integrity number (RIN) for each sample. (C) The purity of EC samples was assessed by qPCR analysis of an EC marker (CD31), a vascular smooth muscle cell (VSMC) marker ( $\alpha$ -SMA) and a macrophage marker (CD14). Cultured PAECs, VSMCs and macrophages were tested as positive controls for CD31,  $\alpha$ -SMA and CD14 expression respectively.

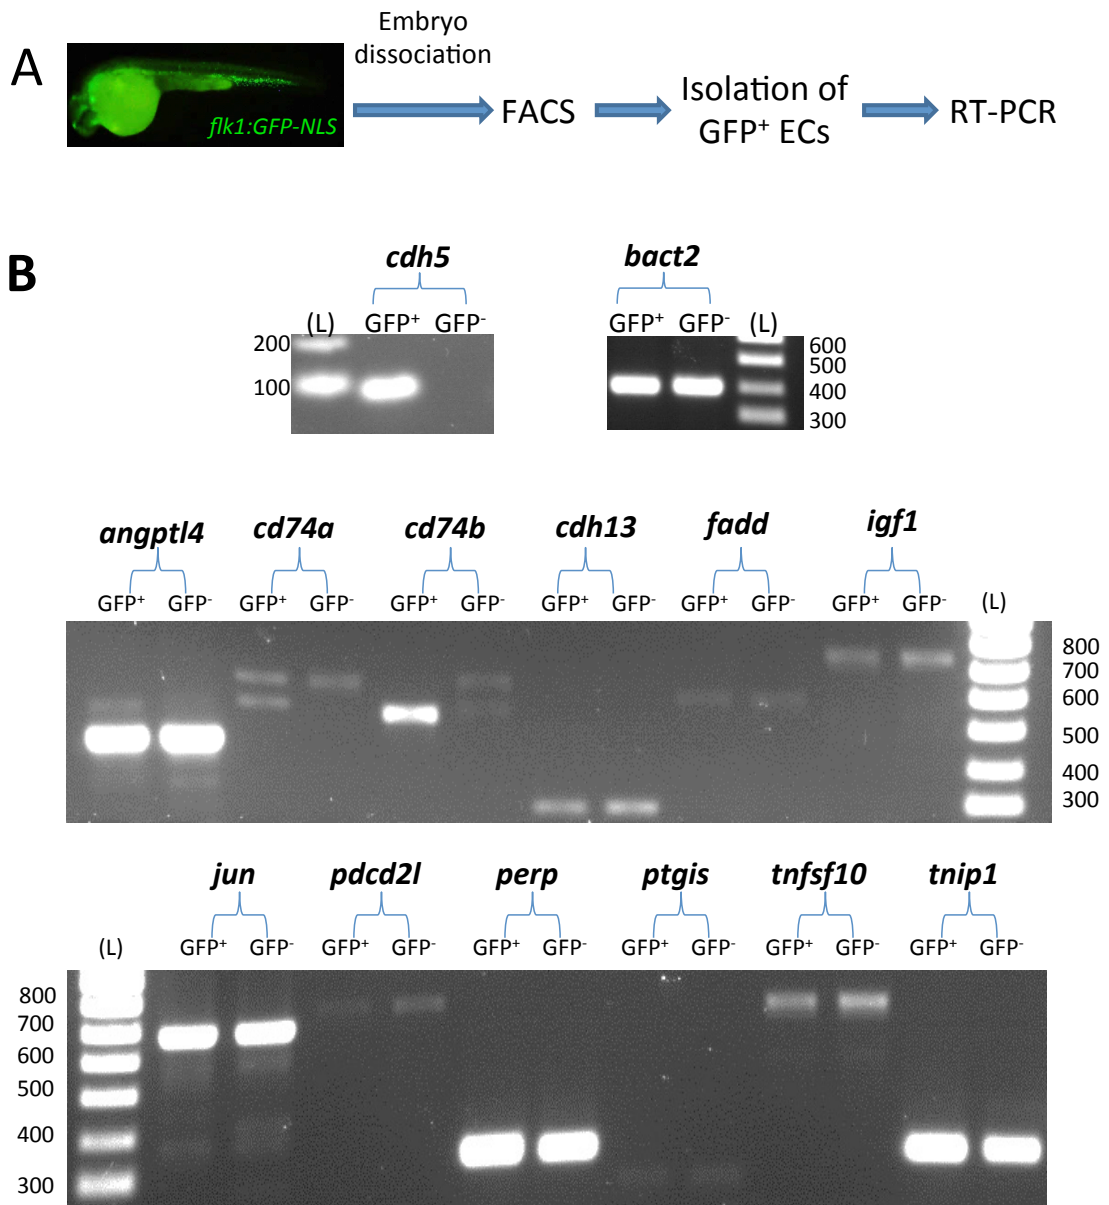

**Supplemental Fig VII. Isolation of ECs from zebrafish embryos and measurement of candidate gene expression by RT-PCR.** (A) ECs were isolated from 26 hpf *flk1:EGFP-NLS* zebrafish embryos using fluorescence-activated cell sorting (FACS). (B) Expression of EC marker *cdh5*, house-keeping gene beta-actin (*bact2*) and candidate genes of interest was assessed in ECs (GFP<sup>+</sup>) by RT-PCR followed by analysis of product by gel electrophoresis, while GFP<sup>-</sup> cells were used as a control. The DNA fragment sizes are indicated in base pairs next to the DNA ladder (L).

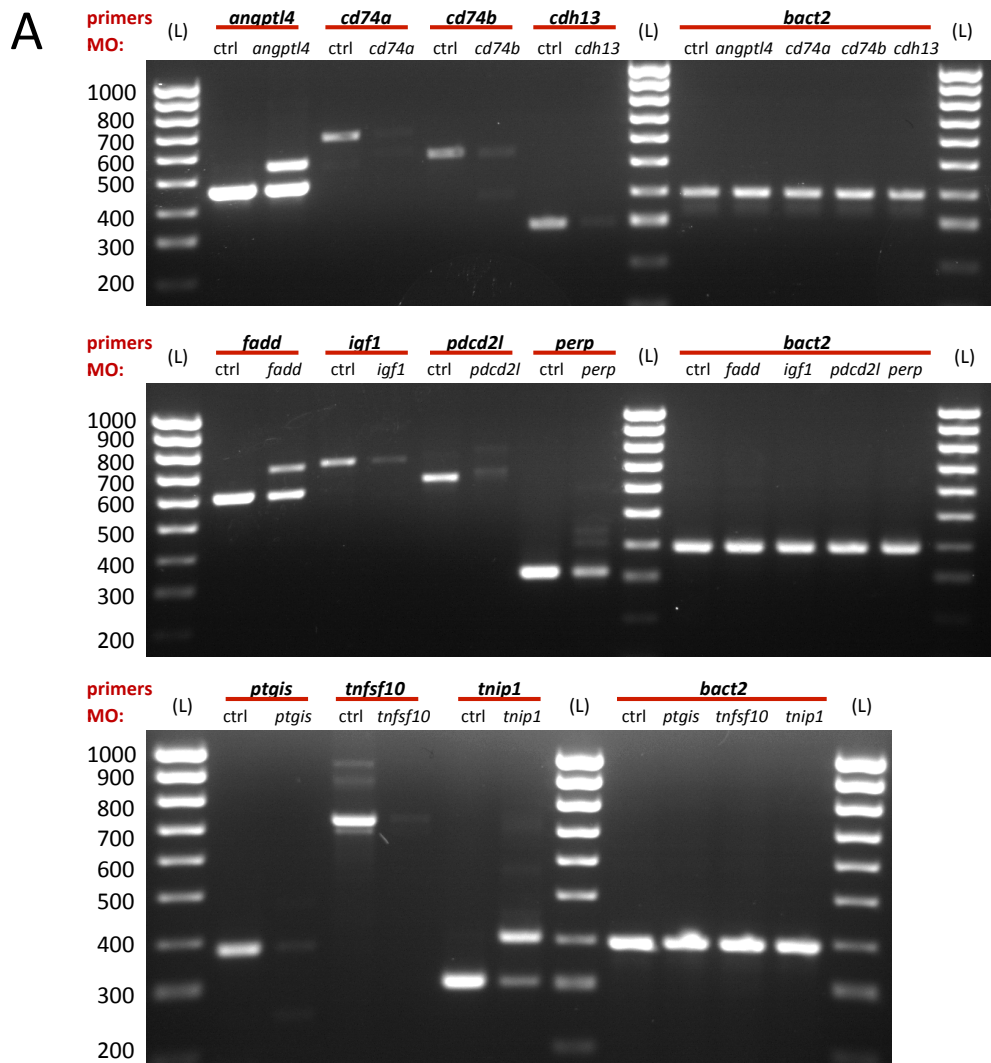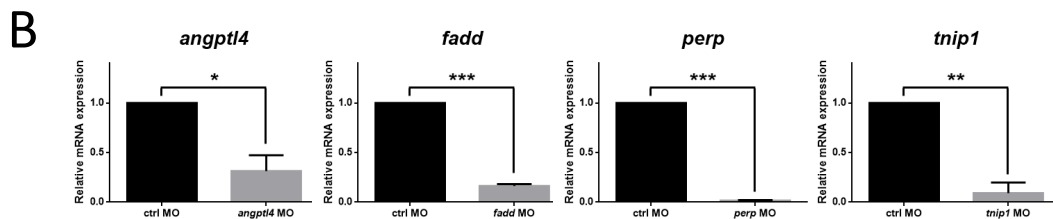

### Supplemental Fig VIII

**Validation of MO efficiency.** (A) The ability of gene-specific splice-blocking MOs to modify splicing of targeted transcripts was assessed by analysis of RT-PCR products after agarose gel electrophoresis. Splicing modifications were observed as a band shift or as a reduction of the wildtype band compared to the control sample (ctrl MO). RT-PCR analysis of beta-actin (*bact2*) was used as an internal control. The DNA fragment sizes are indicated in base pairs next to the DNA ladder (L). (B) Embryos with residual expression of the wildtype transcript (i.e. *angptl4*, *fadd*, *perp* and *tnip1* in (A)) were additionally tested by qPCR to validate MO efficiency. Based on sequencing results of the additional bands produced by MO injection (data not shown), the qPCR primers were designed to detect the wildtype transcript only. Mean values are shown with standard error of the mean. n=3 from three independent experiments; \*p<0.05, \*\*p<0.01, \*\*\*p<0.001 using an unpaired two-tailed t-test.

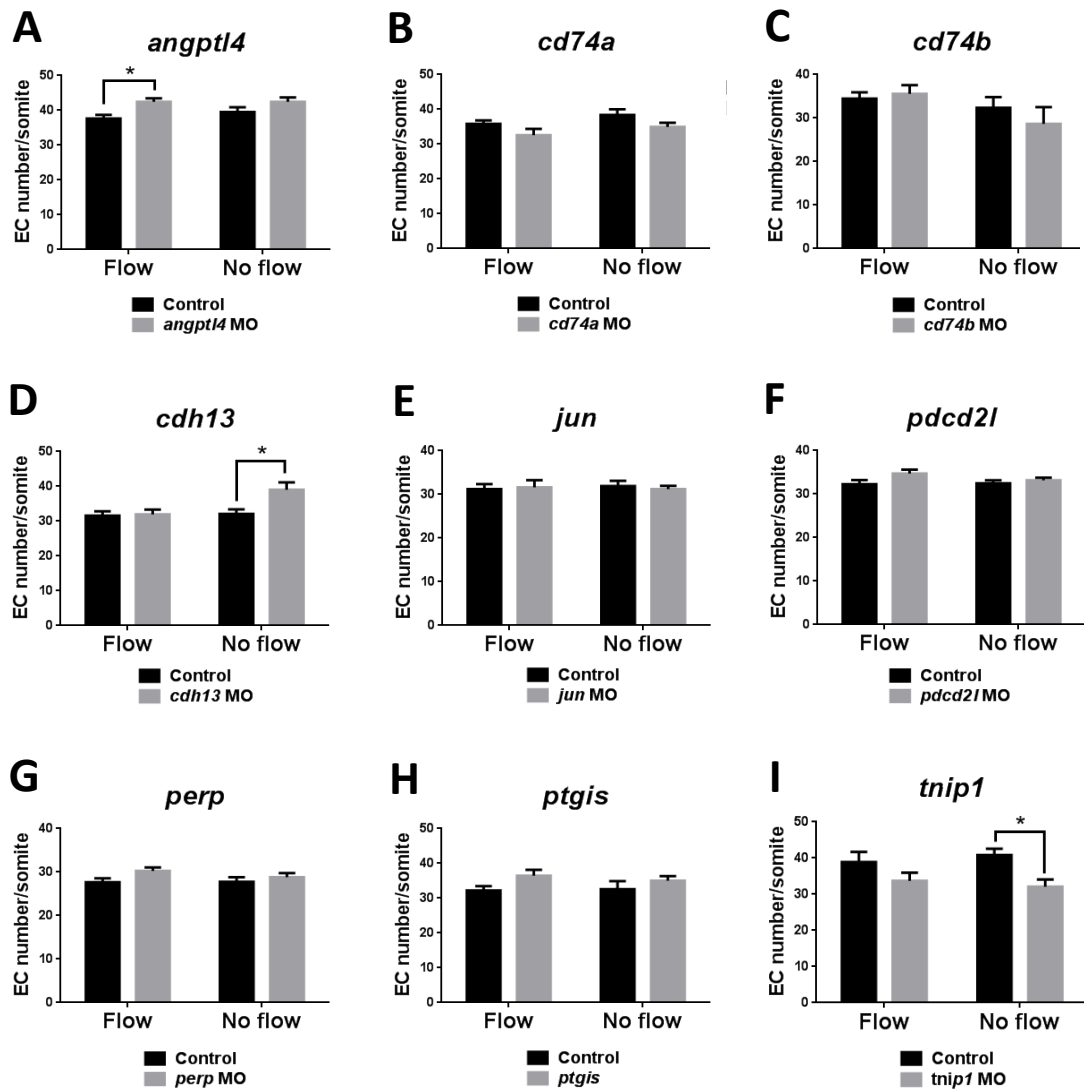

### Supplemental Fig IX.

**Quantification of EC numbers in knockdown embryos.** (A-I) Zebrafish *flk1:EGFP-NLS* embryos were injected with MOs targeting candidate genes or a non-targeting control MO in the presence or in the absence of flow (*sih* MO). Graphs show EC numbers (number of GFP<sup>+</sup> EC nuclei) normalised to *sih* MO-injected embryos. Mean values are shown with standard error of the mean.  $n \geq 15$  from three independent experiments. \* $p < 0.05$ , using one-way ANOVA.



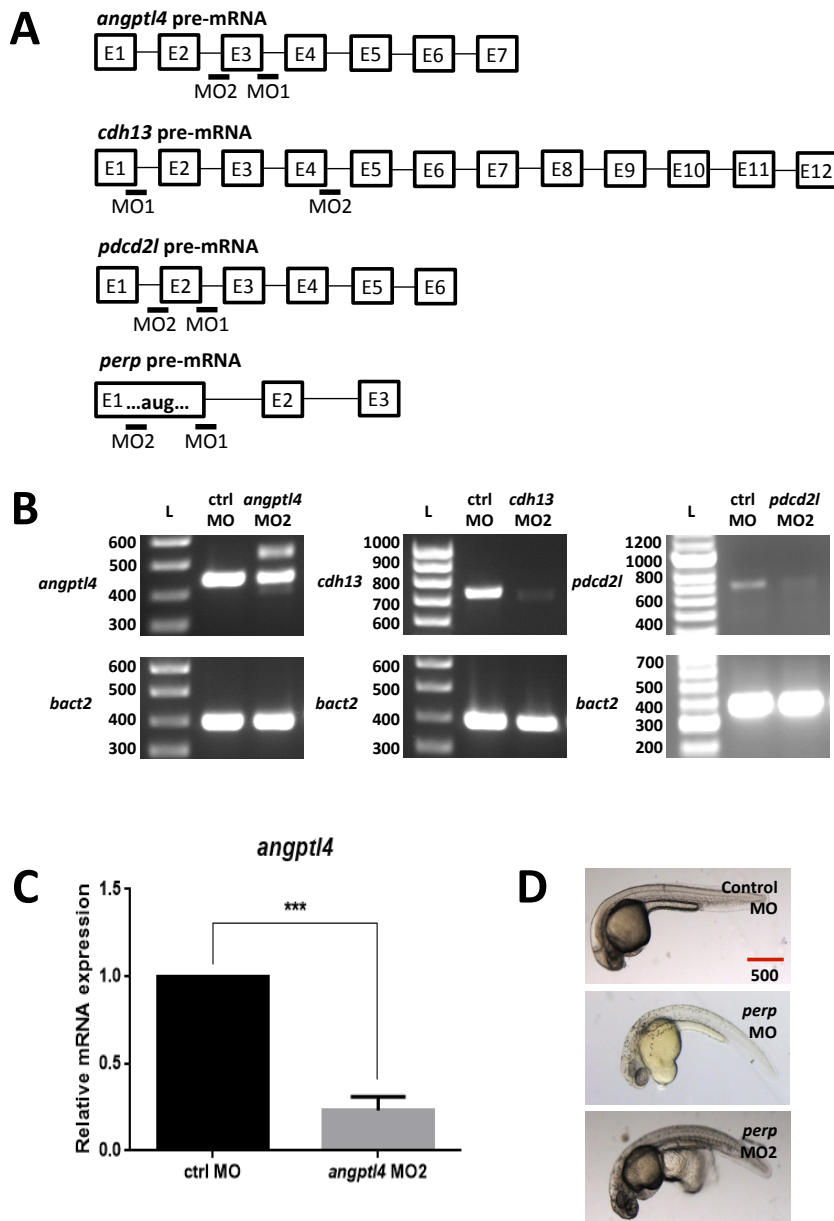

**Supplemental Fig X. Design and validation of second non-overlapping MOs to target *angptl4*, *cdh13*, *pdcd2l* and *perp*.** (A) Diagrammatic representation of *angptl4*, *cdh13*, *pdcd2l* and *perp* pre-mRNAs with exons (numbered boxes) and introns (solid lines). Exon and intron sizes are arbitrary. The regions in pre-mRNA where MOs bind are indicated with black bars labelled MO1 or MO2. (B) Zebrafish embryos were injected with second non-overlapping MO (MO2) for each gene of interest. The ability of *angptl4* MO2, *cdh13* MO2 and *pdcd2l* MO2 to modify splicing of the targeted transcript was assessed by analysis of RT-PCR products after agarose gel electrophoresis. Splicing modifications were observed as a band shift or as a reduction of the wildtype band compared to the control sample (ctrl MO). RT-PCR analysis of beta-actin (*bact2*) was used as an internal control. The DNA fragment sizes are indicated in base pairs next to the DNA ladder (L). (C) Embryos with residual expression of the wildtype transcript (*angptl4* MO2 in (B)) were additionally tested by qPCR to validate MO efficiency. Mean values are shown with standard error of the mean from three independent experiments. \*\*\* $p < 0.001$ , using an unpaired two-tailed t-test. (D) Embryos injected with either *perp* MO or a non-overlapping MO (MO2) exhibited bursting of yolk cell during dechoriation using forceps, which was not observed in control embryos. Embryos are shown at 30 hpf, lateral view, anterior to the left, dorsal up. Scale bar: 500  $\mu\text{m}$ .

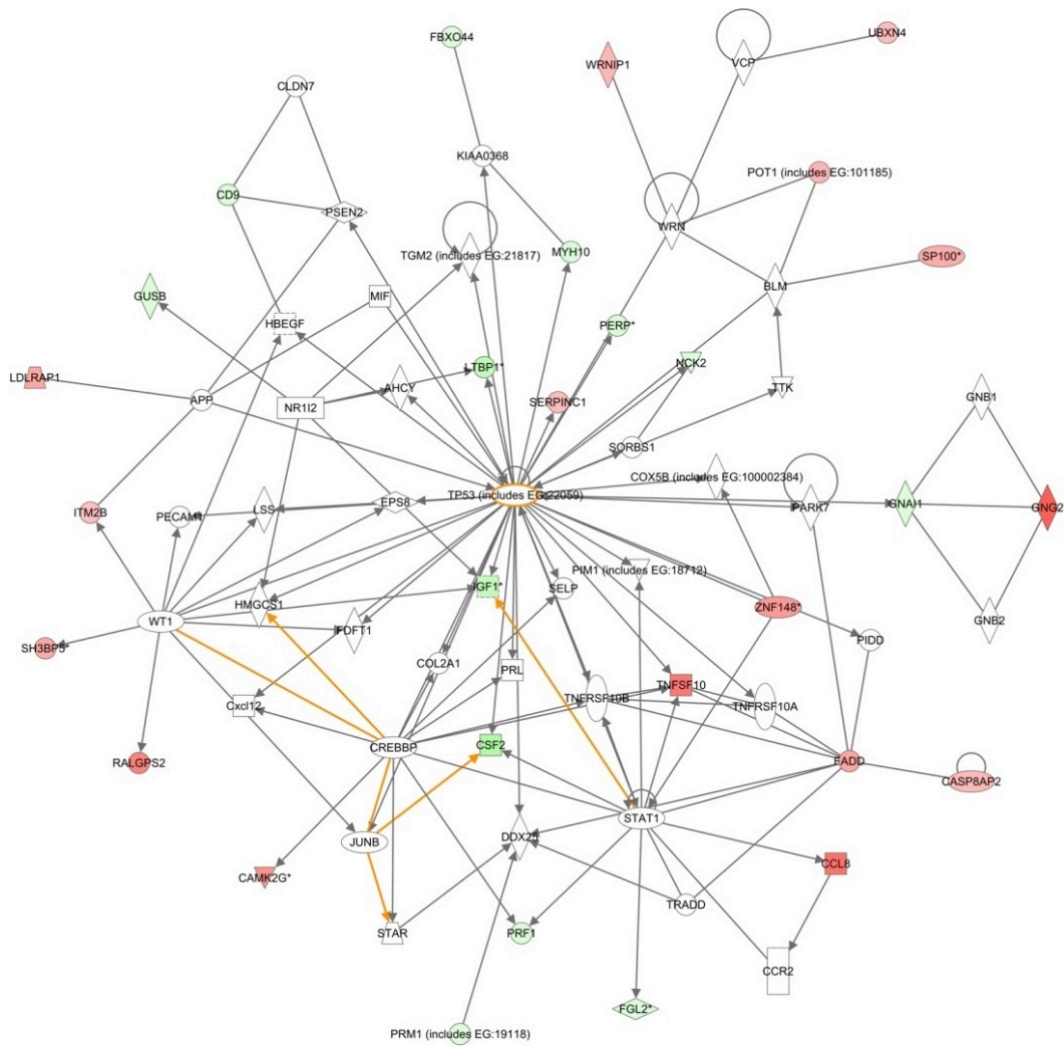

### Supplemental Fig XI.

**Assessment of differentially expressed genes using Ingenuity Pathway Analysis.** The EC transcriptome was studied at high and low WSS regions in 5 pigs using microarrays and differentially expressed genes were annotated using DAVID. Genes with a putative role in apoptosis were assembled into a functional interaction network using Ingenuity Pathway Analysis software. Red represents genes that were enriched at the high WSS site, whereas green marks those enriched at the low WSS region. The shape of the objects indicates their function; inverted triangle, kinase; vertical diamond, enzyme; horizontal oval, transcription factor; circle, other; square, cytokine/growth factor.



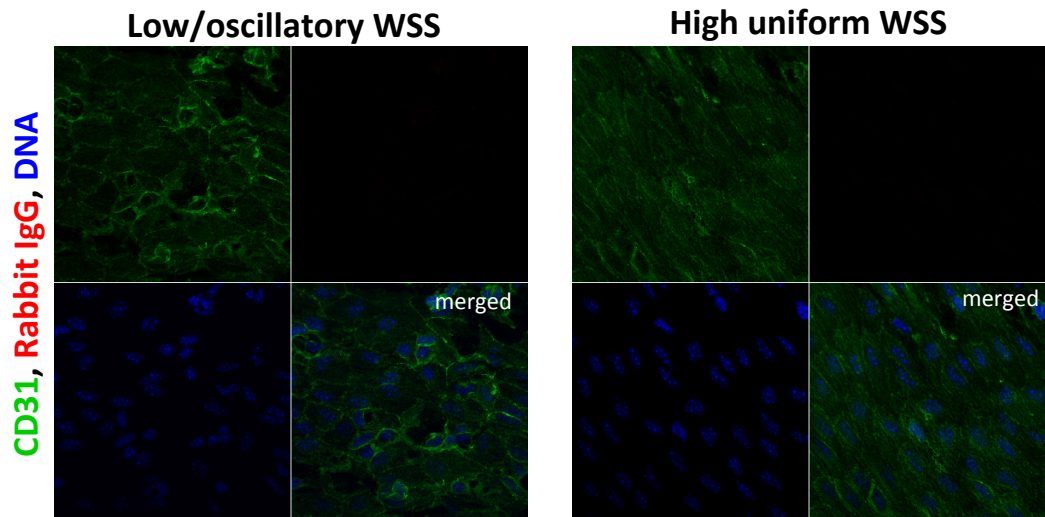

**Supplemental Fig XII. Negative control for *en face* staining of murine endothelium.** Isotype-matched rabbit IgG control antibody was used to control for specific staining of low/oscillatory WSS (inner curvature) or high WSS (outer curvature) regions of the mouse aortic arch. ECs were identified by co-staining with anti-CD31 antibody conjugated to Alexa Fluor 488 (green). Cell nuclei were identified using To-Pro-3 (blue).

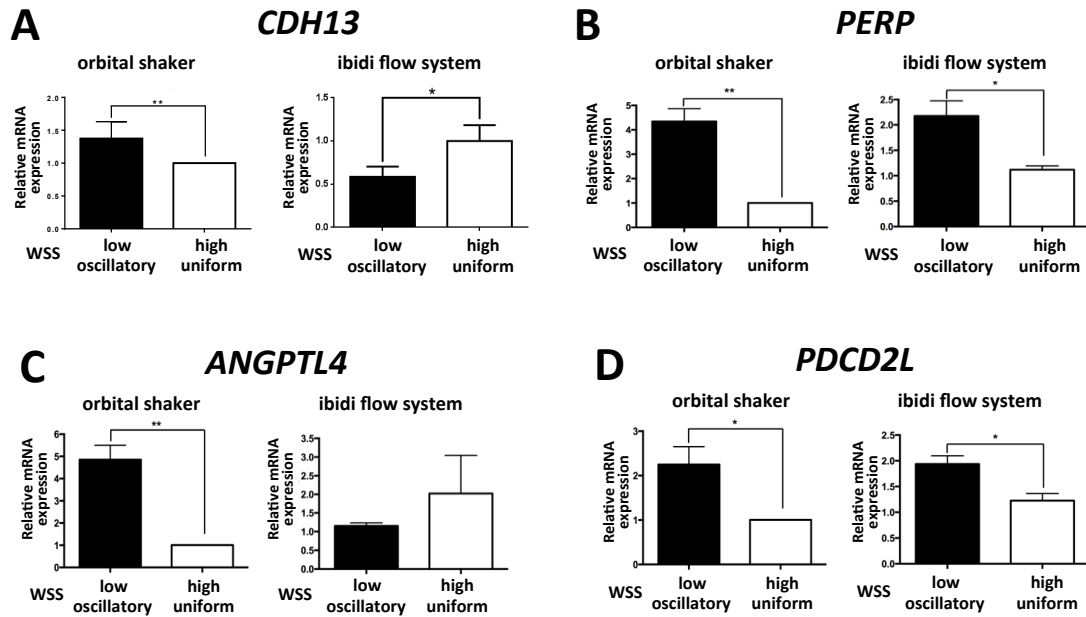

**Supplemental Fig XIII. Induction of apoptotic regulators by flow in cultured endothelial cells.** PAECs were cultured in 6-well plates and exposed to orbital shaking (left panels) to generate low oscillatory WSS (4.8 dyne/cm<sup>2</sup>) at the centre of the well and high uniform WSS (13 dyne/cm<sup>2</sup>) at the periphery. Alternatively, they were grown on ibidi microslides (right panels) and exposed to low oscillatory WSS ( $\pm 4$  dyne/cm<sup>2</sup>, 1 Hz) or high uniform WSS (13 dyne/cm<sup>2</sup>). After 72 h, transcript levels of CDH13 (A), PERP (B), ANGPTL4 (C) and PDCD2L (D) were quantified by qRT-PCR using gene-specific primers. Mean values are shown with standard error of the mean; n=5, \*p<0.05, \*\*p<0.01 using an unpaired two-tailed t-test.

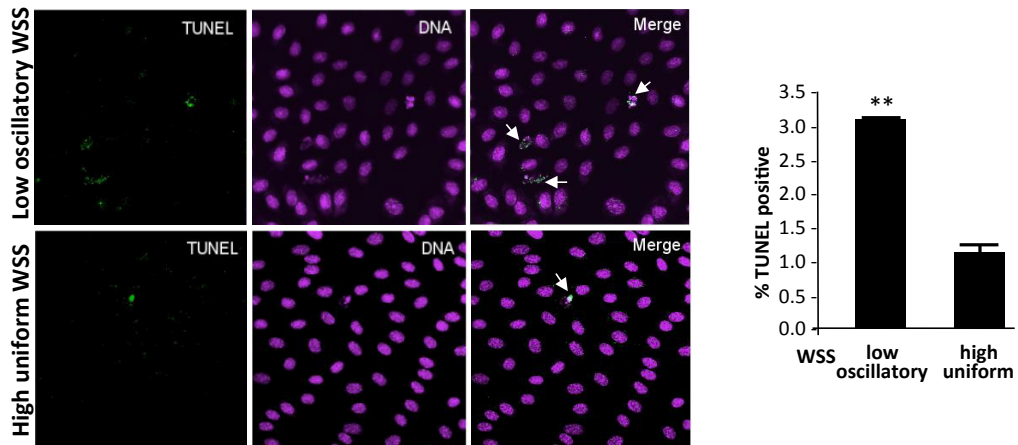

**Supplemental Fig XIV. Low oscillatory WSS induced apoptosis in cultured EC.** HUVECs cultured in 6-well plates were exposed to orbital shaking (210 rpm) for 72 h. Apoptotic cells were measured by TUNEL (green) with To-Pro-3 counterstaining of nuclei (purple; DNA). Apoptotic ECs are indicated with white arrows. Data from at least three independent experiments were pooled. Mean % TUNEL-positive cells are shown with error of the mean. \*\*  $p < 0.01$  using an unpaired two-tailed t-test.

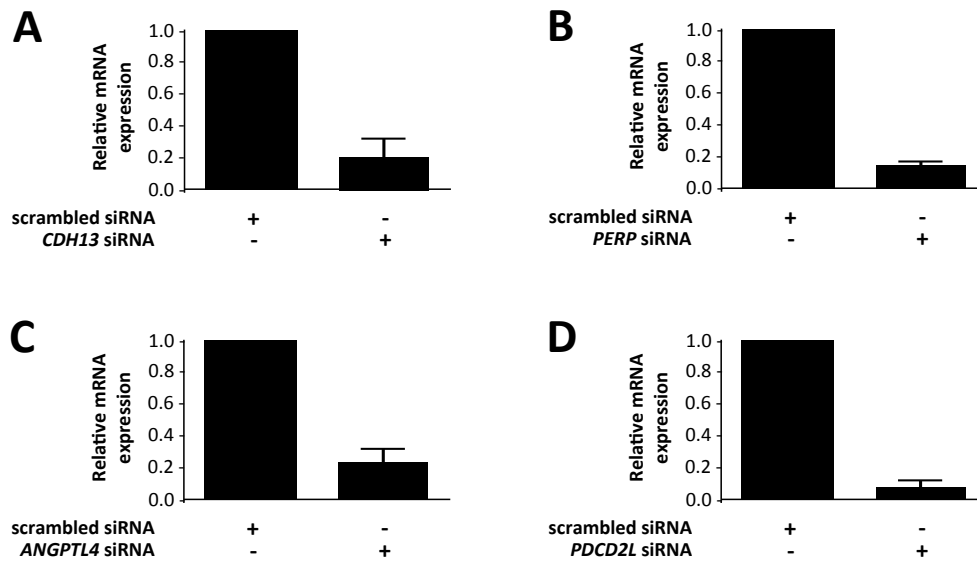

**Supplemental Fig XV. Validation of siRNA-mediated gene knockdown using qRT-PCR.** HUVECs were transfected with scrambled sequences and *CDH13* (A), *PERP* (B), *ANGPTL4* (C) or *PDCD2L* (D) siRNA and incubated for 24 h. Relative mRNA levels were measured by qRT-PCR and data from three independent experiments are presented as mean with standard error of the mean.

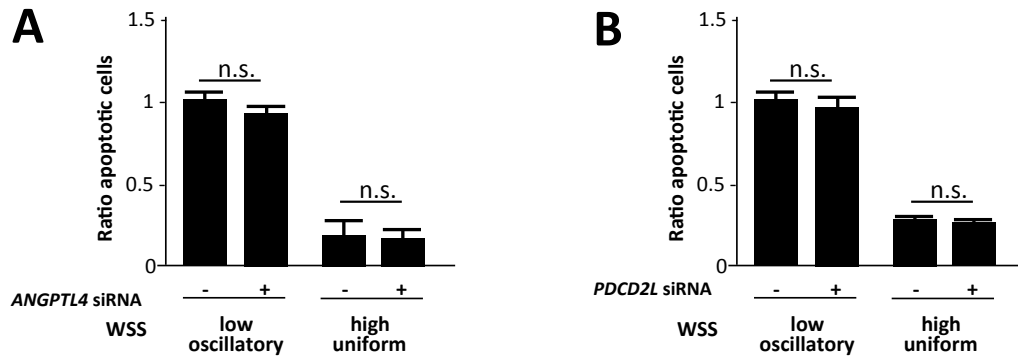

**Supplemental Fig XVI. *In vitro* functional study of *ANGPTL4* and *PDCD2L*.** HUVECs were transfected with scrambled sequences and *ANGPTL4* (A) or *PDCD2L* (B) siRNA and incubated for 24 h. Cells were exposed for 72 h to low oscillatory (centre) or high uniform (periphery) WSS using the orbital system. Apoptotic cells were measured by immunofluorescent staining using antibodies that detect cleaved caspase-3. Data from at least three independent experiments were pooled and the proportion of apoptotic cells are shown with standard error of the mean. ns, no significance by two-way ANOVA.

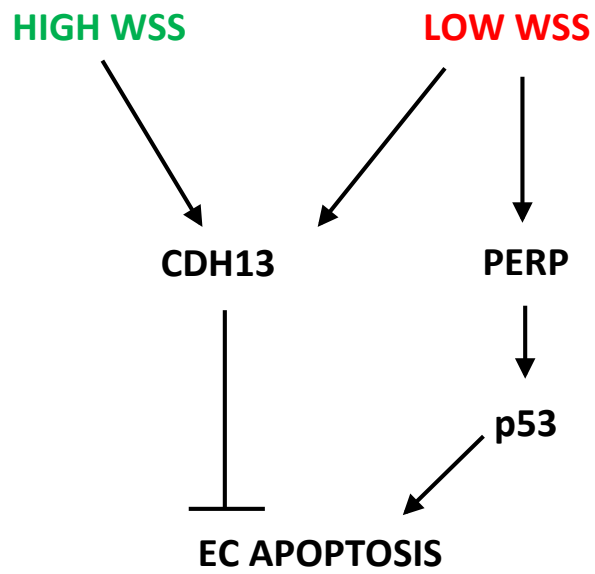

**Supplemental Fig XVII. Proposed model of flow-mediated regulation of EC apoptosis by CDH13 and PERP.**

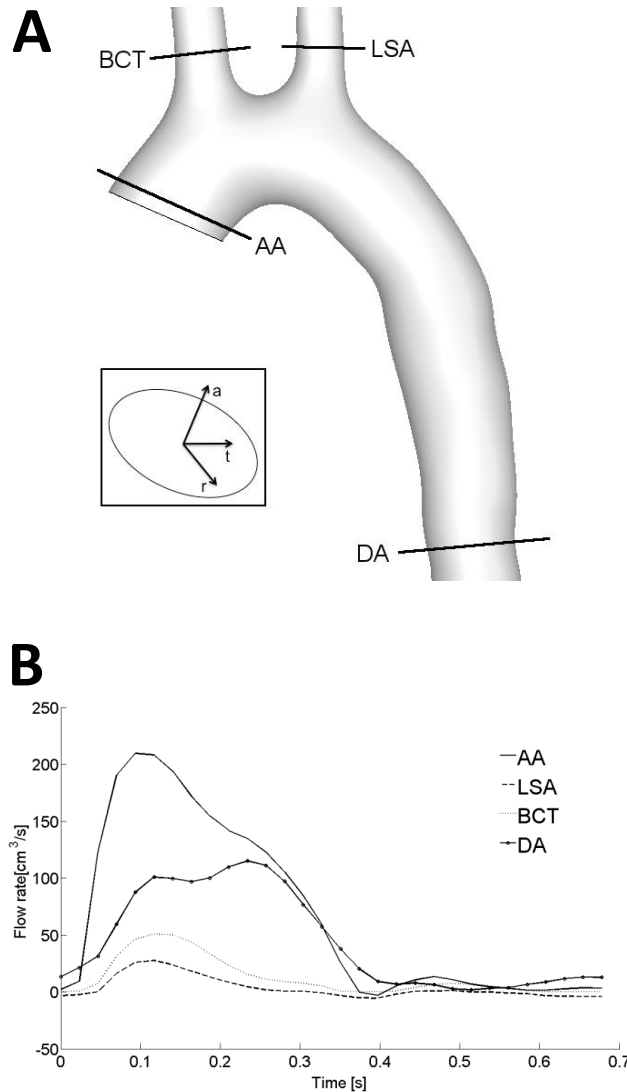

**Supplemental Fig. XVIII**

**Boundary conditions in the porcine aortic arch.** (A) Image-based model of the aorta showing the acquisition planes of the phase contrast-MRI scans and velocity components diagram. The flow data were acquired at cross-sections of the ascending aorta (AA), descending aorta (DA), brachiocephalic trunk (BCT) and left subclavian artery (LSA). All three components of the velocity were measured at different time points of the cardiac cycle and used as boundary conditions at the inlet section. The components were expressed in the local cylindrical coordinates system: a- axial, t-tangential, r-radial. (B) Flow rates measured by phase contrast-MRI at different location of the porcine aortic arch. The flow rate was determined by multiplying the through-plane velocity with the area of the cross-section.

**Supplemental Table I**

|    | Gene symbol          | Regulation in low vs high WSS | Fold change | Probe set ID        | Entrez Gene ID |
|----|----------------------|-------------------------------|-------------|---------------------|----------------|
| 1  | HOXA9                | ↓                             | 19.946184   | Scs.26748.1.A1 at   | 100519066      |
| 2  | HOXB7                | ↓                             | 10.235369   | Scs.22336.1.S1 at   | 100522513      |
| 3  | HOXB7                | ↓                             | 8.086807    | Scs.22336.2.A1 at   | 100522513      |
| 4  | HOXB6                | ↓                             | 5.838337    | Scs.13232.2.A1 at   | 100627849      |
| 5  | HOXB6                | ↓                             | 4.302616    | Scs.13232.2.A1_s at | 100627849      |
| 6  | CDH13                | ↓                             | 3.9784467   | Scs.12939.1.S1 at   | 100126163      |
| 7  | GNG2                 | ↓                             | 3.936485    | Scs.7256.1.A1 at    | 100524008      |
| 8  | FZD8                 | ↓                             | 3.8537142   | Scs.24891.1.S1 at   | N/A            |
| 9  | ARHGAP25             | ↓                             | 3.5988276   | Scs.19344.1.A1 at   | 100514401      |
| 10 | GPR183               | ↓                             | 3.5231488   | Scs.26709.1.S1 at   | 100522635      |
| 11 | C16orf45             | ↓                             | 3.4913924   | Scs.3796.1.S1 at    | 100622402      |
| 12 | HOXD8                | ↓                             | 3.4763258   | Scs.3450.1.S1 at    | 100515172      |
| 13 | PRR15L               | ↓                             | 3.3300211   | Scs.11487.1.A1 at   | 100513831      |
| 14 | CORO2B               | ↓                             | 3.1937869   | Scs.17073.2.S1 at   | 100520530      |
| 15 | GNG2                 | ↓                             | 3.0923002   | Scs.26312.1.S1 at   | 100524008      |
| 16 | HOXB4                | ↓                             | 3.0268426   | Scs.12491.1.A1 at   | 100522341      |
| 17 | CD79B                | ↓                             | 2.9822779   | Scs.12584.1.A1 at   | 100511898      |
| 18 | ORC2                 | ↓                             | 2.856432    | Scs.24449.1.S1 at   | 106510112      |
| 19 | ARL4A                | ↓                             | 2.8441467   | Scs.30613.1.A1 at   | 595121         |
| 20 | PTPLAD2              | ↓                             | 2.8129902   | Scs.8808.1.A1 at    | 100523711      |
| 21 | ATP10A               | ↓                             | 2.7874618   | Scs.8206.1.A1 at    | 100158162      |
| 22 | EML4                 | ↓                             | 2.7337449   | Scs.926.1.A1 at     | 100515021      |
| 23 | EML4                 | ↓                             | 2.7235885   | Scs.3500.1.A1 at    | 100515021      |
| 24 | CCL8                 | ↓                             | 2.7186818   | Scs.9957.1.A1 at    | 100302703      |
| 25 | EML4                 | ↓                             | 2.7038      | Scs.9509.1.A1 at    | 100515021      |
| 26 | STK38L               | ↓                             | 2.6430771   | Scs.3975.1.A1 at    | 100516734      |
| 27 | BCAT1                | ↓                             | 2.637186    | Scs.12561.1.A1 at   | 100152656      |
| 28 | SLA-DOA              | ↓                             | 2.6332066   | Scs.16038.1.S1 at   | 100157996      |
| 29 | HOXB6                | ↓                             | 2.609709    | Scs.20706.1.S1 at   | 100627849      |
| 30 | TNFSF10              | ↓                             | 2.5715754   | Scs.12829.1.A1 at   | 406191         |
| 31 | PUS10                | ↓                             | 2.491379    | Scs.19632.1.S1 at   | 100523369      |
| 32 | THSD7A               | ↓                             | 2.4507859   | Scs.7865.1.A1 at    | 100512249      |
| 33 | PHACTR1              | ↓                             | 2.4434404   | Scs.9834.1.A1 at    | 100153737      |
| 34 | RALGAP2              | ↓                             | 2.380985    | Scs.21236.1.S1 at   | 100522752      |
| 35 | LOC100514323         | ↓                             | 2.374514    | Scs.29437.1.S1 at   | 100514323      |
| 36 | ADORA3               | ↓                             | 2.3440392   | Scs.4756.1.A1 at    | 606753         |
| 37 | FAM126A              | ↓                             | 2.2778978   | Scs.19532.1.S1 at   | 100620255      |
| 38 | TOX                  | ↓                             | 2.2336402   | Scs.2336.1.A1 at    | 100155888      |
| 39 | HOXA10               | ↓                             | 2.2318113   | Scs.12652.1.A1 at   | 100620451      |
| 40 | SMARCAD1             | ↓                             | 2.2300062   | Scs.9911.1.A1 at    | 100515330      |
| 41 | RNF144A              | ↓                             | 2.221699    | Scs.29623.1.A1 at   | N/A            |
| 42 | CHML                 | ↓                             | 2.203723    | Scs.28933.1.S1 at   | 100521677      |
| 43 | FGGY                 | ↓                             | 2.1963584   | Scs.5993.1.A1 at    | 102166471      |
| 44 | BAR superfamily, new | ↓                             | 2.161302    | Scs.14173.1.S1 at   | N/A            |
| 45 | SHPRH                | ↓                             | 2.0846393   | Scs.22076.1.S1 at   | 100154314      |
| 46 | CAMK2G               | ↓                             | 2.0840695   | Scs.2491.1.S1 at    | 397394         |
| 47 | PRR24-like           | ↓                             | 2.0673795   | Scs.4025.1.S1 at    | N/A            |
| 48 | CYP2U1               | ↓                             | 2.0584033   | Scs.28083.1.A1 at   | 100518620      |
| 49 | GJA5                 | ↓                             | 2.0545404   | Scs.3015.1.S1 at    | 100157795      |
| 50 | CDKN2AIP             | ↓                             | 2.0342124   | Scs.20386.1.S1 at   | 100513762      |
| 51 | UGP2                 | ↓                             | 2.0246205   | Scs.30801.1.A1 at   | 100620996      |
| 52 | RPS6KA5              | ↓                             | 2.0002036   | Scs.2132.1.S1 a at  | 100152046      |
| 53 | BAG5                 | ↓                             | 1.9761075   | Scs.4063.1.S1 at    | 100626167      |
| 54 | SLA-DRA              | ↓                             | 1.973723    | Scs.222.1.S1 at     | 100135040      |
| 55 | ZNF518A              | ↓                             | 1.972793    | Scs.7334.1.A1 at    | 100153530      |
| 56 | SLA-DMB              | ↓                             | 1.9677062   | Scs.11025.1.S1 at   | 100135050      |
| 57 | CD74                 | ↓                             | 1.9585812   | Scs.6222.1.S1 a at  | 396660         |
| 58 | ZNF148               | ↓                             | 1.9488881   | Scs.30750.1.A1 at   | 100515279      |
| 59 | WDR48                | ↓                             | 1.9487313   | Scs.3296.1.S1 at    | 100518629      |
| 60 | TP53INP1             | ↓                             | 1.9481462   | Scs.29750.1.A1 at   | 100157451      |
| 61 | CALML4               | ↓                             | 1.9262187   | Scs.4434.1.S1 at    | 100519528      |
| 62 | ANKMY2               | ↓                             | 1.9242777   | Scs.12856.1.A1 at   | 100514124      |
| 63 | IKZF5                | ↓                             | 1.912228    | Scs.24196.2.S1 a at | 100153217      |
| 64 | JUN                  | ↓                             | 1.9092457   | Scs.22550.1.A1 at   | 396913         |
| 65 | TMEM199(C17orf32)    | ↓                             | 1.9003505   | Scs.4755.1.A1 at    | 100623454      |



|     | Gene symbol | Regulation in low vs high WSS | Fold change | Probe set ID        | Entrez Gene ID |
|-----|-------------|-------------------------------|-------------|---------------------|----------------|
| 66  | LRP8        | ↓                             | 1.8974873   | Ssc.31012.1.A1_at   | 100187577      |
| 67  | HOXA7       | ↓                             | 1.8931614   | Ssc.13853.1.A1_at   | 100519456      |
| 68  | ERCC5       | ↓                             | 1.8794332   | Ssc.6879.1.A1_at    | 100622935      |
| 69  | RNF214      | ↓                             | 1.8783178   | Ssc.5610.1.S1_a_at  | 100510972      |
| 70  | ANK3        | ↓                             | 1.8657414   | Ssc.13587.1.A1_at   | 100154687      |
| 71  | JUN         | ↓                             | 1.8520523   | Ssc.9075.1.A1_at    | 396913         |
| 72  | RNF144A     | ↓                             | 1.8444637   | Ssc.18231.1.S1_at   | N/A            |
| 73  | ZNF184      | ↓                             | 1.8444128   | Ssc.30158.1.A1_at   | 100620153      |
| 74  | CARD9       | ↓                             | 1.832908    | Ssc.18896.1.A1_at   | N/A            |
| 75  | ARID4A      | ↓                             | 1.8304753   | Ssc.24407.1.S1_at   | 100153197      |
| 76  | USP47       | ↓                             | 1.8230982   | Ssc.27154.1.S1_at   | 100519588      |
| 77  | Pirh2       | ↓                             | 1.8075595   | Ssc.9304.1.A1_at    | 100038006      |
| 78  | TRPM7       | ↓                             | 1.8037517   | Ssc.13606.1.A1_at   | 100157945      |
| 79  | NLR5        | ↓                             | 1.7982252   | Ssc.8942.1.S1_at    | 100135667      |
| 80  | SAMD12      | ↓                             | 1.78391     | Ssc.5979.1.A1_at    | 100738445      |
| 81  | GGA3        | ↓                             | 1.7812867   | Ssc.6502.1.A1_at    | 100525777      |
| 82  | TRAPP4      | ↓                             | 1.7777481   | Ssc.16983.3.S1_a_at | 100516212      |
| 83  | THSD7A      | ↓                             | 1.7729049   | Ssc.2552.1.A1_at    | 100512249      |
| 84  | GPR157      | ↓                             | 1.7722937   | Ssc.2179.1.S1_at    | N/A            |
| 85  | MTAP        | ↓                             | 1.7709556   | Ssc.27049.1.A1_at   | 100516774      |
| 86  | FNIP1       | ↓                             | 1.7639365   | Ssc.13512.1.A1_at   | 100521611      |
| 87  | IMPA1       | ↓                             | 1.755362    | Ssc.24718.1.S1_at   | 397425         |
| 88  | BCAT1       | ↓                             | 1.7538699   | Ssc.18004.1.A1_at   | 100518784      |
| 89  | SFXN2       | ↓                             | 1.7394273   | Ssc.18078.1.A1_at   | 100152984      |
| 90  | BEND7       | ↓                             | 1.7391009   | Ssc.5800.1.A1_at    | N/A            |
| 91  | CDYL        | ↓                             | 1.7381872   | Ssc.8312.1.A1_at    | 100155291      |
| 92  | PDHX        | ↓                             | 1.7376887   | Ssc.7185.1.A1_at    | 100525559      |
| 93  | ARID4A      | ↓                             | 1.737268    | Ssc.24155.1.S1_at   | 100153197      |
| 94  | FNBP1       | ↓                             | 1.7287087   | Ssc.1801.2.S1_at    | 100518593      |
| 95  | ZNF33B      | ↓                             | 1.720862    | Ssc.7510.1.A1_at    | 100738050      |
| 96  | TCHP        | ↓                             | 1.7203513   | Ssc.24883.1.A1_at   | 100518693      |
| 97  | BCAT1       | ↓                             | 1.7195811   | Ssc.12565.1.A1_at   | 100152656      |
| 98  | FADD        | ↓                             | 1.7169782   | Ssc.1947.1.S1_at    | 595129         |
| 99  | USP47       | ↓                             | 1.7168034   | Ssc.29734.1.A1_at   | 100519588      |
| 100 | FNBP1       | ↓                             | 1.7161055   | Ssc.1801.1.A1_at    | 100518593      |
| 101 | MID1P1      | ↓                             | 1.7051815   | Ssc.25129.1.A1_at   | 100526197      |
| 102 | SLA-DQA1    | ↓                             | 1.7035724   | Ssc.11102.1.S1_at   | 100153387      |
| 103 | BCAT1       | ↓                             | 1.702749    | Ssc.27431.1.A1_at   | 100152656      |
| 104 | C19orf12    | ↓                             | 1.7026932   | Ssc.27761.1.S1_at   | 100627784      |
| 105 | SLA-DQB1    | ↓                             | 1.7002095   | Ssc.11063.1.S1_at   | 100037921      |
| 106 | XRCC6BP1    | ↓                             | 1.6985786   | Ssc.12964.1.S1_at   | 100737094      |
| 107 | TMCC1       | ↓                             | 1.6962711   | Ssc.9518.1.A1_at    | 100512192      |
| 108 | P2RX7       | ↓                             | 1.6942111   | Ssc.11608.1.A1_at   | 497623         |
| 109 | IKZF5       | ↓                             | 1.6921072   | Ssc.24196.1.S1_at   | 100153217      |
| 110 | LPCAT1      | ↓                             | 1.6901907   | Ssc.11242.1.S1_at   | 100217397      |
| 111 | EML4        | ↓                             | 1.6768227   | Ssc.23111.1.A1_at   | 100515021      |
| 112 | PTGIS       | ↓                             | 1.6767997   | Ssc.2502.1.S1_at    | 100126284      |
| 113 | chur        | ↓                             | 1.6761332   | Ssc.14297.1.S1_at   | 100514910      |
| 114 | POC5        | ↓                             | 1.6743059   | Ssc.17188.1.A1_at   | 100519012      |
| 115 | MUM1        | ↓                             | 1.6651121   | Ssc.3809.1.A1_at    | 100511862      |
| 116 | ARID4A      | ↓                             | 1.6639371   | Ssc.8703.1.A1_at    | 100153197      |
| 117 | Cxorf38     | ↓                             | 1.6611629   | Ssc.12020.1.A1_at   | 100515115      |
| 118 | TLK1        | ↓                             | 1.6509433   | Ssc.13037.1.A1_at   | 100157412      |
| 119 | CDR2        | ↓                             | 1.6500056   | Ssc.3394.1.A1_at    | 100626193      |
| 120 | SYNRG       | ↓                             | 1.6495525   | Ssc.18498.2.A1_at   | 100624012      |
| 121 | MKRN2       | ↓                             | 1.6485447   | Ssc.818.2.A1_at     | 100626891      |
| 122 | METTL11A    | ↓                             | 1.6477703   | Ssc.19574.1.A1_at   | 100516660      |
| 123 | LDLRAP1     | ↓                             | 1.6468419   | Ssc.26245.1.S1_at   | 100125967      |
| 124 | CBFA2T2     | ↓                             | 1.645752    | Ssc.11884.1.A1_at   | 100157067      |
| 125 | DDI2        | ↓                             | 1.6439716   | Ssc.2004.1.A1_at    | 100519198      |
| 126 | LNPEP       | ↓                             | 1.6434716   | Ssc.7777.1.A1_at    | 100125826      |
| 127 | ADO         | ↓                             | 1.6421105   | Ssc.11901.1.S1_at   | 100153304      |
| 128 | ARID1A      | ↓                             | 1.641297    | Ssc.4617.2.S1_at    | 100513359      |
| 129 | SLA-DRB1    | ↓                             | 1.6394564   | Ssc.210.1.S1_a_at   | 100153386      |
| 130 | CDR2        | ↓                             | 1.6380332   | Ssc.3394.3.A1_at    | 100626193      |

|     | Gene symbol                   | Regulation in low vs high WSS | Fold change | Probe set ID       | Entrez Gene ID |
|-----|-------------------------------|-------------------------------|-------------|--------------------|----------------|
| 131 | CACUL1                        | ↓                             | 1.6378405   | Sc.16799.1.A1_at   | 100737227      |
| 132 | OSGEP1                        | ↓                             | 1.6310734   | Sc.2595.1.S1_at    | 100512818      |
| 133 | FBNP1                         | ↓                             | 1.6246257   | Sc.1801.2.S1_a_at  | 100518593      |
| 134 | GOSR1                         | ↓                             | 1.6238722   | Sc.5643.1.A1_at    | 100517676      |
| 135 | MAP2K5                        | ↓                             | 1.6234636   | Sc.9944.1.A1_at    | N/A            |
| 136 | CAMK2G                        | ↓                             | 1.6230392   | Sc.5879.4.S1_a_at  | 397394         |
| 137 | ZNF148                        | ↓                             | 1.619686    | Sc.21426.1.S1_at   | 100515279      |
| 138 | MTG2                          | ↓                             | 1.6172359   | Sc.1334.1.A1_a_at  | N/A            |
| 139 | MAN1A1                        | ↓                             | 1.6165802   | Sc.29024.1.S1_at   | 396919         |
| 140 | CUL5(VACM-1)                  | ↓                             | 1.6158081   | Sc.4549.1.A1_at    | 100525708      |
| 141 | SH3BP5                        | ↓                             | 1.6143107   | Sc.28336.1.A1_at   | 100517856      |
| 142 | ZNF330                        | ↓                             | 1.6103315   | Sc.26825.1.S1_at   | 100511765      |
| 143 | BIVM                          | ↓                             | 1.6091915   | Sc.6752.1.S1_at    | 100512068      |
| 144 | GPATCH1                       | ↓                             | 1.6069031   | Sc.7644.1.A1_at    | 100525924      |
| 145 | SOS2                          | ↓                             | 1.601014    | Sc.18317.1.A1_at   | 100156602      |
| 146 | ATAD2B                        | ↓                             | 1.5972787   | Sc.10724.1.A1_at   | 100518905      |
| 147 | SH3BP5                        | ↓                             | 1.5942206   | Sc.25282.1.S1_at   | 100517856      |
| 148 | SRRM1                         | ↓                             | 1.5931035   | Sc.30202.1.A1_at   | 100521629      |
| 149 | SP100                         | ↓                             | 1.5871345   | Sc.7207.3.A1_at    | 100516940      |
| 150 | SLA-DRB1                      | ↓                             | 1.5854198   | Sc.210.2.S1_a_at   | 100153386      |
| 151 | ELMO2                         | ↓                             | 1.5843375   | Sc.2298.1.S1_at    | 100153181      |
| 152 | DNAIC5                        | ↓                             | 1.5836406   | Sc.27168.1.S1_at   | 100621635      |
| 153 | C9orf40                       | ↓                             | 1.5814447   | Sc.6388.1.A1_at    | 100517993      |
| 154 | SAMD12                        | ↓                             | 1.580022    | Sc.1708.1.S1_at    | 100738445      |
| 155 | ATG4B                         | ↓                             | 1.5786996   | Sc.6320.1.A1_at    | 100462747      |
| 156 | NKIRAS2                       | ↓                             | 1.5721251   | Sc.23472.1.S1_at   | 100524706      |
| 157 | AKAP7                         | ↓                             | 1.5719472   | Sc.29749.1.A1_at   | 100523651      |
| 158 | PLA1A                         | ↓                             | 1.5708334   | Sc.15424.1.S1_at   | 100154368      |
| 159 | GPATCH2                       | ↓                             | 1.5700215   | Sc.22368.1.A1_at   | 100513810      |
| 160 | PRORSD1                       | ↓                             | 1.564619    | Sc.21808.1.S1_at   | 100514282      |
| 161 | PHF17                         | ↓                             | 1.5620664   | Sc.13638.2.A1_a_at | 100516328      |
| 162 | HTB2                          | ↓                             | 1.5594175   | Sc.2474.1.S1_at    | 100523961      |
| 163 | ANGEL2                        | ↓                             | 1.5574449   | Sc.5494.1.A1_at    | 100523200      |
| 164 | TMEM53                        | ↓                             | 1.5562224   | Sc.11335.1.A1_at   | 100517102      |
| 165 | RAD17                         | ↓                             | 1.5549328   | Sc.21361.1.A1_at   | 100515763      |
| 166 | Luc7-like 1                   | ↓                             | 1.5507433   | Sc.31171.1.S1_at   | 100737615      |
| 167 | SUV420H1                      | ↓                             | 1.5492636   | Sc.4394.1.S1_at    | 100521358      |
| 168 | MXD1                          | ↓                             | 1.544877    | Sc.10022.1.A1_at   | 100625349      |
| 169 | ARV1                          | ↓                             | 1.5389528   | Sc.29739.1.A1_at   | 100151849      |
| 170 | APRIL                         | ↓                             | 1.5356606   | Sc.26879.2.S1_at   | 100127162      |
| 171 | STX16                         | ↓                             | 1.5334104   | Sc.16389.1.S1_at   | 100144526      |
| 172 | APG5                          | ↓                             | 1.5271122   | Sc.2160.1.S1_at    | N/A            |
| 173 | GSKIP                         | ↓                             | 1.5264741   | Sc.1084.1.S1_at    | 100154584      |
| 174 | HSDL1                         | ↓                             | 1.5252693   | Sc.21858.1.A1_at   | 100516372      |
| 175 | RBM25                         | ↓                             | 1.5239364   | Sc.8506.1.A1_at    | 100511390      |
| 176 | NICE-3                        | ↓                             | 1.5239034   | Sc.8693.1.S1_at    | 100518371      |
| 177 | CEP57-like                    | ↓                             | 1.5174923   | Sc.8270.1.S1_at    | 100518322      |
| 178 | CHD9                          | ↓                             | 1.5151073   | Sc.13364.1.A1_at   | N/A            |
| 179 | ANTXR1                        | ↓                             | 1.5144627   | Sc.20172.1.A1_at   | 100513853      |
| 180 | DGUOK                         | ↓                             | 1.5120171   | Sc.10592.1.A1_at   | 100515889      |
| 181 | ZNF839                        | ↓                             | 1.5094002   | Sc.26700.1.S1_at   | 100152925      |
| 182 | C9orf40                       | ↓                             | 1.5085456   | Sc.22490.1.S1_at   | 100517993      |
| 183 | KDM5B                         | ↓                             | 1.5074414   | Sc.17712.2.S1_at   | 100511772      |
| 184 | AREL1                         | ↓                             | 1.5067781   | Sc.4181.1.S1_at    | 100622552      |
| 185 | PRODH                         | ↓                             | 1.5051893   | Sc.1813.1.S1_at    | 100524089      |
| 186 | ANKRD27                       | ↓                             | 1.5026225   | Sc.7196.1.A1_at    | 100524146      |
| 187 | GSKIP//C7H14orf129            | ↓                             | 1.5014261   | Sc.13743.1.S1_at   | 100154584      |
| 188 | CCDC56                        | ↓                             | 1.5014015   | Sc.3838.1.S1_at    | 100518575      |
| 189 | CMYA5//AP5M1                  | ↓                             | 1.5011969   | Sc.27500.1.A1_at   | 100513193      |
| 190 | USP47                         | ↓                             | 1.4958131   | Sc.10129.1.S1_at   | 100519588      |
| 191 | C6orf136//DUF2358 superfamily | ↓                             | 1.4939694   | Sc.4883.1.A1_at    | 100152775      |
| 192 | PIAS3                         | ↓                             | 1.4895221   | Sc.6032.1.S1_at    | 100511878      |
| 193 | MAP7D1                        | ↓                             | 1.4885817   | Sc.1951.1.S1_at    | 100511265      |
| 194 | RPS19BP1                      | ↓                             | 1.4877795   | Sc.3542.1.S1_at    | 100518907      |
| 195 | BIVM                          | ↓                             | 1.4875659   | Sc.19133.1.A1_at   | 100512068      |

|     | Gene symbol       | Regulation in low vs high WSS | Fold change | Probe set ID        | Entrez Gene ID |
|-----|-------------------|-------------------------------|-------------|---------------------|----------------|
| 196 | CALML4            | ↓                             | 1.4861591   | Scs.6845.1.A1 at    | 100519528      |
| 197 | KDM5A             | ↓                             | 1.4838719   | Scs.19273.3.S1 at   | 100294704      |
| 198 | GRB2              | ↓                             | 1.4834785   | Scs.27313.3.S1 at   | 100192436      |
| 199 | CCDC51            | ↓                             | 1.4813484   | Scs.13063.1.S1 at   | 100521222      |
| 200 | ATG10             | ↓                             | 1.481278    | Scs.11852.1.A1 at   | 100462744      |
| 201 | ORC3              | ↓                             | 1.4805428   | Scs.13441.1.A1 at   | 100519524      |
| 202 | PHF17             | ↓                             | 1.4766477   | Scs.13638.1.A1 a at | 100516328      |
| 203 | WWP2              | ↓                             | 1.4722648   | Scs.3721.1.S1 at    | 100626361      |
| 204 | SUZ12             | ↓                             | 1.4693431   | Scs.1286.1.A1 at    | 100294712      |
| 205 | MFAP1             | ↓                             | 1.4691318   | Scs.4348.2.S1 at    | 100157390      |
| 206 | HIST1H1D          | ↓                             | 1.4688598   | Scs.19327.1.S1 at   | 595122         |
| 207 | FMR1              | ↓                             | 1.4685771   | Scs.25167.1.A1 at   | 100155078      |
| 208 | LRRK1             | ↓                             | 1.4668978   | Scs.25233.1.S1 at   | 100521353      |
| 209 | SP100             | ↓                             | 1.4643824   | Scs.7207.2.A1 at    | 100516940      |
| 210 | PIN4              | ↓                             | 1.4642389   | Scs.18633.1.S1 at   | 100524473      |
| 211 | RFTN2             | ↓                             | 1.4624918   | Scs.10247.1.S1 at   | 100520462      |
| 212 | ZDHHC7            | ↓                             | 1.4495702   | Scs.3617.2.S1 at    | 100514104      |
| 213 | ZCCHC8            | ↓                             | 1.4493873   | Scs.4055.1.A1 at    | 100157314      |
| 214 | TXLNA             | ↓                             | 1.4446361   | Scs.1423.1.A1 at    | 100522017      |
| 215 | VEZF1             | ↓                             | 1.444204    | Scs.12255.1.A1 at   | 100511406      |
| 216 | RCAN3             | ↓                             | 1.4438319   | Scs.28328.2.A1 at   | 100522144      |
| 217 | ATP8A1            | ↓                             | 1.4417562   | Scs.19482.1.A1 at   | 100515393      |
| 218 | STAT5B            | ↓                             | 1.4411074   | Scs.16047.2.S1 at   | 397340         |
| 219 | DNAJB2            | ↓                             | 1.4407461   | Scs.1180.1.S1 at    | 100522168      |
| 220 | FRA10AC1          | ↓                             | 1.4406893   | Scs.832.1.S1 at     | 100157308      |
| 221 | SMAP2             | ↓                             | 1.4406629   | Scs.3072.1.S1 at    | 100145888      |
| 222 | LRP6              | ↓                             | 1.4392573   | Scs.4693.3.S1 a at  | 100515777      |
| 223 | UBP1              | ↓                             | 1.4332042   | Scs.10876.1.S1 at   | 100512254      |
| 224 | NSMAF             | ↓                             | 1.426117    | Scs.22275.1.S1 at   | 100153039      |
| 225 | CCDC117           | ↓                             | 1.424431    | Scs.7745.1.A1 at    | 100737460      |
| 226 | PRPF18            | ↓                             | 1.4238194   | Scs.13735.1.A1 at   | 100511773      |
| 227 | ZNF238            | ↓                             | 1.4221326   | Scs.21986.1.S1 at   | 100623289      |
| 228 | HMGCL             | ↓                             | 1.4191952   | Scs.27317.1.S1 at   | 100621218      |
| 229 | TP53INP1          | ↓                             | 1.4178016   | Scs.30871.1.A1 at   | 100157451      |
| 230 | PLXDC2            | ↓                             | 1.4153379   | Scs.12603.1.A1 at   | 100522568      |
| 231 | TOR1AIP2          | ↓                             | 1.4144878   | Scs.1620.1.A1 at    | 100627970      |
| 232 | KDM5A             | ↓                             | 1.4138042   | Scs.19273.1.A1 at   | 100294704      |
| 233 | SLA-DMB           | ↓                             | 1.4122739   | Scs.12882.1.A1 at   | 100135050      |
| 234 | TPR               | ↓                             | 1.411703    | Scs.22099.2.A1 at   | 100520507      |
| 235 | LXN               | ↓                             | 1.4093919   | Scs.2983.1.A1 at    | 100620551      |
| 236 | TMEM87A           | ↓                             | 1.4078664   | Scs.30974.1.S1 at   | 100154984      |
| 237 | ZNF605            | ↓                             | 1.4067224   | Scs.31180.1.A1 at   | 100155634      |
| 238 | SLA-3             | ↓                             | 1.405378    | Scs.13780.9.S1 a at | 100037288      |
| 239 | LIMD1             | ↓                             | 1.404453    | Scs.30639.1.S1 at   | 100738579      |
| 240 | NAGA              | ↓                             | 1.4030142   | Scs.8873.1.A1 at    | 100142667      |
| 241 | ZFHX3             | ↓                             | 1.3994361   | Scs.8422.1.A1 at    | 100519194      |
| 242 | BPTF              | ↓                             | 1.3985949   | Scs.1385.1.S1 at    | 100525424      |
| 243 | GPATCH2L          | ↓                             | 1.3966646   | Scs.11508.1.A1 at   | 100153141      |
| 244 | AUH               | ↓                             | 1.3953178   | Scs.12622.1.A1 a at | 100155020      |
| 245 | UPF0561///C2orf68 | ↓                             | 1.3938141   | Scs.21620.1.S1 at   | 100620143      |
| 246 | FLAG1             | ↓                             | 1.3910651   | Scs.24281.1.A1 at   | N/A            |
| 247 | ZNF652            | ↓                             | 1.3900046   | Scs.30952.1.A1 at   | 100524338      |
| 248 | POT1              | ↓                             | 1.3834908   | Scs.21430.1.S1 at   | 100192443      |
| 249 | NOXP20            | ↓                             | 1.38339     | Scs.3021.1.A1 at    | 100525173      |
| 250 | LRIG2             | ↓                             | 1.3807962   | Scs.3003.1.S1 at    | 100154795      |
| 251 | KDM2A             | ↓                             | 1.3797257   | Scs.24207.1.A1 at   | 100294703      |
| 252 | MAP4K3            | ↓                             | 1.3770274   | Scs.16445.1.A1 at   | 100519831      |
| 253 | IDE               | ↓                             | 1.376735    | Scs.9109.1.A1 at    | 100155309      |
| 254 | ZNF292            | ↓                             | 1.3766184   | Scs.19121.1.A1 at   | 100517252      |
| 255 | TOMM5             | ↓                             | 1.3762743   | Scs.872.1.S1 a at   | 100520533      |
| 256 | GCP60             | ↓                             | 1.3742001   | Scs.26214.1.A1 at   | 100621148      |
| 257 | DDX6              | ↓                             | 1.3736061   | Scs.7089.1.A1 at    | 100515499      |
| 258 | SUGP2             | ↓                             | 1.3712014   | Scs.1300.1.A1 at    | 100511863      |
| 259 | TTC17             | ↓                             | 1.3693042   | Scs.18899.1.A1 at   | 100521838      |
| 260 | BRD8              | ↓                             | 1.3691893   | Scs.7279.1.A1 at    | 100518182      |

|     | Gene symbol     | Regulation in low vs high WSS | Fold change | Probe set ID        | Entrez Gene ID |
|-----|-----------------|-------------------------------|-------------|---------------------|----------------|
| 261 | MAX             | ↓                             | 1.367563    | Ssc.19313.1.A1_at   | 100517170      |
| 262 | CHEK1           | ↓                             | 1.3660244   | Ssc.29650.1.A1_at   | 100511709      |
| 263 | RCBTB1          | ↓                             | 1.364094    | Ssc.28150.1.S1_at   | 100628042      |
| 264 | FMR1            | ↓                             | 1.3638347   | Ssc.27393.1.S1_at   | 100155078      |
| 265 | UPF3B           | ↓                             | 1.3625139   | Ssc.22179.1.A1_at   | 414433         |
| 266 | ACTR6           | ↓                             | 1.3621515   | Ssc.24251.1.S1_a_at | 100620672      |
| 267 | RAB11FIP2       | ↓                             | 1.3594759   | Ssc.13291.1.S1_at   | 100153733      |
| 268 | LOC100525937    | ↓                             | 1.3582821   | Ssc.3494.1.A1_at    | 100525937      |
| 269 | ISCU            | ↓                             | 1.3582519   | Ssc.7879.1.S1_at    | 100621691      |
| 270 | MITD1           | ↓                             | 1.357193    | Ssc.10408.1.S1_at   | 100523366      |
| 271 | TTC33           | ↓                             | 1.3568549   | Ssc.18637.1.A1_at   | 100625161      |
| 272 | ZEB1            | ↓                             | 1.3561156   | Ssc.9299.1.S1_at    | 100520325      |
| 273 | FAM104A         | ↓                             | 1.3535918   | Ssc.4995.3.A1_at    | 100518034      |
| 274 | GBA2            | ↓                             | 1.3533192   | Ssc.15216.1.S1_at   | 100155655      |
| 275 | HDAC5           | ↓                             | 1.3532587   | Ssc.4125.1.A1_at    | 100515165      |
| 276 | ANKS6           | ↓                             | 1.3529372   | Ssc.21901.1.S1_at   | 100152629      |
| 277 | FAM134A/C2orf17 | ↓                             | 1.3463604   | Ssc.1366.1.S1_at    | 100156393      |
| 278 | WRNIP1          | ↓                             | 1.3448923   | Ssc.2136.1.S1_at    | 100155921      |
| 279 | SUN1            | ↓                             | 1.3429621   | Ssc.10938.1.S1_at   | 100522311      |
| 280 | MGP             | ↓                             | 1.3408589   | Ssc.373.1.S1_at     | 397206         |
| 281 | TNPO3           | ↓                             | 1.3394185   | Ssc.4478.1.A1_at    | 100515455      |
| 282 | LIMCH1          | ↓                             | 1.3393929   | Ssc.10466.1.A1_at   | 100515040      |
| 283 | SORT1           | ↓                             | 1.3387518   | Ssc.12492.2.S1_at   | 100157862      |
| 284 | NTAN1           | ↓                             | 1.3386791   | Ssc.149.1.S1_at     | 397107         |
| 285 | ANKS1A          | ↓                             | 1.3371844   | Ssc.29819.1.A1_at   | 100625697      |
| 286 | GSK3B           | ↓                             | 1.3361373   | Ssc.22547.1.S1_at   | 100126852      |
| 287 | ZKSCAN5         | ↓                             | 1.3333199   | Ssc.2755.1.S1_at    | 100522312      |
| 288 | FUBP3           | ↓                             | 1.3288034   | Ssc.23802.1.S1_at   | 100524188      |
| 289 | ANKRD54         | ↓                             | 1.3260444   | Ssc.24098.2.S1_at   | 100525518      |
| 290 | VPS35           | ↓                             | 1.325336    | Ssc.26019.1.S1_at   | 100623578      |
| 291 | RAB2B           | ↓                             | 1.3239303   | Ssc.8370.1.A1_at    | 100513669      |
| 292 | RORA            | ↓                             | 1.3221625   | Ssc.26039.1.S1_at   | 100156637      |
| 293 | DCTD            | ↓                             | 1.3218298   | Ssc.2007.1.S1_at    | 100154836      |
| 294 | UPF3B           | ↓                             | 1.3214906   | Ssc.2192.1.A1_at    | 414433         |
| 295 | TRUB2           | ↓                             | 1.3195932   | Ssc.7494.1.A1_at    | 100157964      |
| 296 | CHMP4A          | ↓                             | 1.3166322   | Ssc.1636.1.S1_at    | 100520257      |
| 297 | TSPAN14         | ↓                             | 1.3161929   | Ssc.2569.1.S1_at    | 100154486      |
| 298 | BAZ1B           | ↓                             | 1.3067816   | Ssc.20056.1.S1_at   | 100625872      |
| 299 | ZFAND2B         | ↓                             | 1.3051437   | Ssc.21640.2.S1_a_at | 100157982      |
| 300 | PAP7            | ↓                             | 1.3037138   | Ssc.19058.1.S1_at   | 494461         |
| 301 | PARP12          | ↓                             | 1.3035105   | Ssc.13068.1.A1_at   | 100515805      |
| 302 | ERCC8           | ↓                             | 1.3022738   | Ssc.25036.1.S1_at   | 100524405      |
| 303 | PIAS1           | ↓                             | 1.2991236   | Ssc.5358.1.S1_at    | 100519005      |
| 304 | CASP8AP2        | ↓                             | 1.2983356   | Ssc.24845.1.S1_at   | 100523759      |
| 305 | MSTN            | ↓                             | 1.297279    | Ssc.24083.1.A1_at   | 399534         |
| 306 | UBE2R2          | ↓                             | 1.2966303   | Ssc.4948.1.S1_at    | 100512675      |
| 307 | LZTS2           | ↓                             | 1.2957842   | Ssc.2100.1.S1_at    | 100625806      |
| 308 | BBS4            | ↓                             | 1.291044    | Ssc.15249.1.S1_at   | 100513212      |
| 309 | DYNC1LI2        | ↓                             | 1.2897233   | Ssc.7287.1.A1_at    | 100626901      |
| 310 | FAM207A         | ↓                             | 1.2878661   | Ssc.17751.1.S1_at   | 100623984      |
| 311 | DYNC1I2         | ↓                             | 1.2864742   | Ssc.1201.1.S1_at    | 100153352      |
| 312 | ZDHC17          | ↓                             | 1.2854146   | Ssc.24119.1.A1_at   | 100514712      |
| 313 | TAX1BP1         | ↓                             | 1.2815381   | Ssc.6722.1.A1_at    | 100516165      |
| 314 | KDM5A           | ↓                             | 1.2805303   | Ssc.13085.1.S1_at   | 100294704      |
| 315 | CNTF            | ↓                             | 1.2793785   | Ssc.3599.1.S1_at    | 100518821      |
| 316 | TPCN2           | ↓                             | 1.2793741   | Ssc.16652.1.S1_at   | 100523421      |
| 317 | TPP2            | ↓                             | 1.2760087   | Ssc.6979.1.A1_at    | 100511152      |
| 318 | TJP2            | ↓                             | 1.2743537   | Ssc.16907.1.A1_at   | 100513065      |
| 319 | TAB2            | ↓                             | 1.2734888   | Ssc.4161.1.A1_at    | 100156182      |
| 320 | MYH9            | ↓                             | 1.2697904   | Ssc.17295.1.S1_at   | 396904         |
| 321 | PLXDC2          | ↓                             | 1.2587172   | Ssc.25615.1.A1_at   | 100522568      |
| 322 | FBXO38          | ↓                             | 1.2569319   | Ssc.9650.1.S1_a_at  | 100513273      |
| 323 | TBL1X           | ↓                             | 1.2552079   | Ssc.19636.1.S1_at   | 100624648      |
| 324 | ZNF131          | ↓                             | 1.2532858   | Ssc.6837.1.A1_at    | 100525619      |
| 325 | TPP2            | ↓                             | 1.2508465   | Ssc.14205.1.S1_at   | 100511152      |

|     | Gene symbol   | Regulation in low vs high WSS | Fold change | Probe set ID         | Entrez Gene ID |
|-----|---------------|-------------------------------|-------------|----------------------|----------------|
| 326 | SEC31A        | ↘                             | 1.2483761   | Ssc.11165.1.S1 at    | 100511210      |
| 327 | RtcB          | ↘                             | 1.2483679   | Ssc.5319.1.S1 at     | 733658         |
| 328 | OTUD3         | ↘                             | 1.2482762   | Ssc.2328.1.S1 at     | N/A            |
| 329 | UPF3B         | ↘                             | 1.2478641   | Ssc.26341.1.S1 at    | 414433         |
| 330 | CLCN3         | ↘                             | 1.2473717   | Ssc.29052.1.S1 at    | 100156049      |
| 331 | FAM188A       | ↘                             | 1.2466104   | Ssc.15034.1.S1 at    | 100525772      |
| 332 | TBC1D23       | ↘                             | 1.2441875   | Ssc.1010.1.A1 at     | 100524904      |
| 333 | C22orf25      | ↘                             | 1.2415887   | Ssc.2850.3.S1 at     | 100154308      |
| 334 | COMMD9        | ↘                             | 1.2364765   | Ssc.2256.1.S1 at     | 100524189      |
| 335 | FAM21A        | ↘                             | 1.2362039   | Ssc.27237.2.S1 a at  | 100522401      |
| 336 | UBXN4         | ↘                             | 1.2351348   | Ssc.28413.1.A1 at    | 100525432      |
| 337 | SERPINC1      | ↘                             | 1.2318238   | Ssc.27560.1.S1 at    | 100125972      |
| 338 | FAM188A       | ↘                             | 1.2272383   | Ssc.19336.1.A1 s at  | 100525772      |
| 339 | ARIH1         | ↘                             | 1.2271239   | Ssc.19028.1.A1 at    | 100511268      |
| 340 | B2M           | ↘                             | 1.2261658   | Ssc.12348.2.S1 at    | 397033         |
| 341 | HBP1          | ↘                             | 1.2246569   | Ssc.6645.1.S1 at     | 100519099      |
| 342 | RAB35         | ↘                             | 1.2177399   | Ssc.17391.1.S1 at    | 100151805      |
| 343 | CHAF1A        | ↘                             | 1.2136545   | Ssc.7857.1.A1 at     | 100524302      |
| 344 | SPTBN1        | ↘                             | 1.2130053   | Ssc.16046.1.S1 s at  | 100516258      |
| 345 | C19orf42      | ↘                             | 1.2107177   | Ssc.3048.1.S1 at     | 100512765      |
| 346 | VPS25         | ↘                             | 1.2105951   | Ssc.3188.1.S1 at     | 100622124      |
| 347 | ZNF652        | ↘                             | 1.2101111   | Ssc.5954.3.S1 at     | 100524338      |
| 348 | CSNK2A1       | ↘                             | 1.208754    | Ssc.28057.1.A1 at    | 100517435      |
| 349 | ZNF10         | ↘                             | 1.2079518   | Ssc.10898.1.A1 at    | 100627773      |
| 350 | AIFM2         | ↘                             | 1.2025254   | Ssc.2487.1.S1 at     | 100153541      |
| 351 | URM1          | ↘                             | 1.2002077   | Ssc.2196.1.S1 at     | 100153888      |
| 352 | ARGRS(RARS)   | ↘                             | 1.1973017   | Ssc.24387.1.S1 at    | 414410         |
| 353 | MORC2         | ↘                             | 1.1969198   | Ssc.1645.1.S1 at     | 100153895      |
| 354 | CCDC30        | ↘                             | 1.1952308   | Ssc.15180.1.A1 a at  | 100522685      |
| 355 | PPT1          | ↘                             | 1.194955    | Ssc.11457.1.A1 at    | 100517533      |
| 356 | SERINC3       | ↘                             | 1.1948549   | Ssc.887.1.A1 at      | 100152356      |
| 357 | TGFBRAP1      | ↘                             | 1.1939412   | Ssc.1387.2.S1 at     | 100625522      |
| 358 | NAA40         | ↘                             | 1.1928564   | Ssc.3711.1.S1 at     | 100523044      |
| 359 | ARPC1B        | ↘                             | 1.1889032   | Ssc.15456.1.S1 at    | 100174964      |
| 360 | ITM2B         | ↘                             | 1.1888913   | Ssc.1037.1.S1 at     | 595120         |
| 361 | NEU1          | ↘                             | 1.1865914   | Ssc.23310.1.S1 at    | 100124381      |
| 362 | TMSB4X        | ↘                             | 1.180933    | Ssc.4122.1.A1 at     | 100216317      |
| 363 | NEK9          | ↘                             | 1.1795983   | Ssc.13939.1.A1 at    | 100152772      |
| 364 | ZNF84         | ↘                             | 1.1780202   | Ssc.28314.1.S1 at    | 100620909      |
| 365 | PSMF1         | ↘                             | 1.1777529   | Ssc.6353.1.S1 at     | 100152620      |
| 366 | GTF3C5        | ↘                             | 1.1738005   | Ssc.17447.1.A1 at    | 100514889      |
| 367 | PSIP1         | ↘                             | 1.1710576   | Ssc.1539.1.S1 at     | 100157597      |
| 368 | AMBRA1        | ↘                             | 1.1700011   | Ssc.6243.2.S1 at     | 100519700      |
| 369 | VPS28         | ↘                             | 1.164719    | Ssc.10875.1.A1 at    | 100154859      |
| 370 | RCOR3         | ↘                             | 1.1619703   | Ssc.24585.1.S1 at    | 100510922      |
| 371 | POC1A         | ↘                             | 1.1592215   | Ssc.26425.1.S1 at    | 100521113      |
| 372 | TDP54/TPD52L2 | ↘                             | 1.157296    | Ssc.2916.1.A1 at     | N/A            |
| 373 | NR2C1         | ↘                             | 1.1504481   | Ssc.10207.1.A1 at    | 100516014      |
| 374 | NCOR1         | ↘                             | 1.1484798   | Ssc.26588.1.S1 at    | 100037950      |
| 375 | CCDC72        | ↘                             | 1.1472111   | Ssc.5928.1.A1 at     | 100521518      |
| 376 | SEC16A        | ↘                             | 1.1368035   | Ssc.1322.1.S1 at     | 102163628      |
| 377 | VRK1          | ↘                             | 1.134457    | Ssc.24353.2.S1 at    | 100157930      |
| 378 | TGFBRAP1      | ↘                             | 1.1259986   | Ssc.1387.1.S1 at     | 100625522      |
| 379 | TMSB4X        | ↘                             | 1.1208929   | Ssc.4122.1.A1 s at   | 100216317      |
| 380 | GBP2          | ↘                             | 1.1172758   | Ssc.17889.1.A1 at    | 100523668      |
| 381 | GUCY1A2       | ↘                             | 1.1166422   | Ssc.17485.1.S1 at    | 100522091      |
| 382 | ND3           | ↘                             | 1.1161274   | SscAffx.29.1.S1 at   | 808508         |
| 383 | NPEP1         | ↘                             | 1.1109015   | Ssc.11230.1.A1 at    | 100144530      |
| 384 | TNRC6B        | ↘                             | 1.0964177   | Ssc.4265.1.A1 a at   | 100625754      |
| 385 | LAPTM4A       | ↘                             | 1.0928482   | Ssc.5153.1.S1 at     | 100516188      |
| 386 | ND2           | ↘                             | 1.0871962   | SscAffx.33.1.S1 at   | 100515155      |
| 387 | VPS39         | ↘                             | 1.0653918   | Ssc.17266.1.S1 at    | 100513254      |
| 388 | SLA-2         | ↘                             | 1.0586841   | Ssc.13780.12.S1 a at | 100135031      |
| 389 | SLC7A7        | ↗                             | 1.0645334   | Ssc.3715.1.S1 at     | 10037972       |
| 390 | TYRP1         | ↗                             | 1.0833911   | Ssc.13311.1.A1 at    | 100516717      |

|     | Gene symbol                   | Regulation in low vs high WSS | Fold change | Probe set ID       | Entrez Gene ID          |
|-----|-------------------------------|-------------------------------|-------------|--------------------|-------------------------|
| 391 | PAK7                          | ↗                             | 1.0846866   | Ssc.26858.1.A1 at  | 100152316               |
| 392 | PNPLA6                        | ↗                             | 1.091802    | Ssc.11227.1.S1 at  | 100524423               |
| 393 | POLDIP3                       | ↗                             | 1.0919214   | Ssc.11339.2.A1 at  | 100525164               |
| 394 | HAUS7                         | ↗                             | 1.0920017   | Ssc.26999.1.S1 at  | 100518818               |
| 395 | ELF5                          | ↗                             | 1.09305     | Ssc.9472.1.A1 at   | 100510890               |
| 396 | USP16                         | ↗                             | 1.0939736   | Ssc.11900.1.A1 at  | 100623735               |
| 397 | PTGR1                         | ↗                             | 1.0973716   | Ssc.26521.1.A1 at  | 397678                  |
| 398 | CDC42EP5                      | ↗                             | 1.0975119   | Ssc.17268.1.A1 at  | 100525753               |
| 399 | PTC7                          | ↗                             | 1.0980562   | Ssc.24027.2.A1 at  | 100513685               |
| 400 | ACADL                         | ↗                             | 1.1014236   | Ssc.12672.1.A1 at  | 396931                  |
| 401 | LRRC37A2                      | ↗                             | 1.1025498   | Ssc.1406.1.S1 at   | 100514982               |
| 402 | CC2D1B                        | ↗                             | 1.1046464   | Ssc.9403.1.A1 at   | 100622838               |
| 403 | Psmc3ip                       | ↗                             | 1.1049509   | Ssc.12881.1.A1 at  | 100521397               |
| 404 | Kazal-type 14                 | ↗                             | 1.1053799   | Ssc.26171.1.S1 at  | 100739287               |
| 405 | PERP                          | ↗                             | 1.1080321   | Ssc.11670.1.A1 at  | 100513507               |
| 406 | TCEB1                         | ↗                             | 1.1082404   | Ssc.3883.2.S1_a at | 100153381               |
| 407 | ID4                           | ↗                             | 1.1102786   | Ssc.9645.1.S1 at   | 100511514               |
| 408 | MCRS1                         | ↗                             | 1.1110886   | Ssc.5149.1.S1 at   | 100516550               |
| 409 | SUMO1                         | ↗                             | 1.112161    | Ssc.8741.1.A1 at   | 100127139               |
| 410 | ASIC2                         | ↗                             | 1.1129644   | Ssc.21266.2.A1 at  | 100518193               |
| 411 | BDH1 /// LOC100737308         | ↗                             | 1.1139408   | Ssc.18245.1.A1 at  | 100155725 /// 100737308 |
| 412 | ERI3                          | ↗                             | 1.1149908   | Ssc.27329.2.S1 at  | 100521097               |
| 413 | DEFB108B                      | ↗                             | 1.1189868   | Ssc.25487.1.S1 at  | 692190                  |
| 414 | ACTN2                         | ↗                             | 1.1194898   | Ssc.763.1.S1 at    | 100157406               |
| 415 | RBMS1                         | ↗                             | 1.1196808   | Ssc.6805.2.A1 at   | 100525434               |
| 416 | ITFG3                         | ↗                             | 1.1199899   | Ssc.2475.1.S1 at   | 100523363               |
| 417 | TMEM255A                      | ↗                             | 1.1225525   | Ssc.27980.1.A1 at  | 100152537               |
| 418 | C12orf23                      | ↗                             | 1.1228079   | Ssc.9952.1.S1 at   | 100620181               |
| 419 | KANSL3                        | ↗                             | 1.1254379   | Ssc.30201.1.A1 at  | N/A                     |
| 420 | PKHD1L1                       | ↗                             | 1.1264888   | Ssc.12455.1.S1 at  | 100525460               |
| 421 | DMRT-1                        | ↗                             | 1.126523    | Ssc.321.1.S1 at    | 397199                  |
| 422 | FGA-like                      | ↗                             | 1.1296525   | Ssc.4824.1.A1 at   | 100626178               |
| 423 | RNF180                        | ↗                             | 1.1313637   | Ssc.26611.1.A1 at  | 100526254               |
| 424 | DNAL1                         | ↗                             | 1.1328927   | Ssc.29457.1.A1 at  | 100156521               |
| 425 | EIF5A2                        | ↗                             | 1.133744    | Ssc.21681.1.A1 at  | N/A                     |
| 426 | GUSB                          | ↗                             | 1.1339793   | Ssc.18585.2.S1 at  | 100144519               |
| 427 | KIAA1549                      | ↗                             | 1.1356556   | Ssc.26991.1.A1 at  | 100519232               |
| 428 | PUS10                         | ↗                             | 1.1361166   | Ssc.31105.1.A1 at  | 100523369               |
| 429 | TCRB                          | ↗                             | 1.1372119   | Ssc.11075.11.A1 at | 100621664               |
| 430 | PQLC2                         | ↗                             | 1.1373869   | Ssc.16528.2.S1 at  | 100511513               |
| 431 | WBP2                          | ↗                             | 1.1380539   | Ssc.17837.1.A1 at  | 100521149               |
| 432 | NDOR1                         | ↗                             | 1.139997    | Ssc.15685.1.A1 at  | 100515645               |
| 433 | DYRK2                         | ↗                             | 1.1403315   | Ssc.9629.2.S1 at   | 100516081               |
| 434 | CASP14                        | ↗                             | 1.1405201   | Ssc.22118.1.A1 at  | 100518472               |
| 435 | FGFR3IIC                      | ↗                             | 1.1412214   | Ssc.17773.1.A1 at  | 396569                  |
| 436 | MLYCD                         | ↗                             | 1.1412755   | Ssc.18522.2.S1 at  | 497060                  |
| 437 | PMEL                          | ↗                             | 1.1417292   | Ssc.29472.1.S1 at  | 100739533 /// 594851    |
| 438 | PUSL1                         | ↗                             | 1.1437527   | Ssc.2881.1.S1 at   | 100524091               |
| 439 | SLC30A9                       | ↗                             | 1.1442661   | Ssc.18392.1.A1 at  | 100192440               |
| 440 | Igh                           | ↗                             | 1.1454268   | Ssc.16359.8.S1 at  | 406179                  |
| 441 | AKR1CL1                       | ↗                             | 1.14671     | Ssc.11273.1.A1 at  | 654406                  |
| 442 | HTR1D                         | ↗                             | 1.1467996   | Ssc.15993.1.S1 at  | 397309                  |
| 443 | BRCA1                         | ↗                             | 1.1468185   | Ssc.29471.1.A1 at  | 100049662               |
| 444 | ARSE                          | ↗                             | 1.1468554   | Ssc.11950.1.A1 at  | 100627778               |
| 445 | BPI (by EST blast and blastp) | ↗                             | 1.1496148   | Ssc.8960.1.A1 at   | 100286800               |
| 446 | PTPN13                        | ↗                             | 1.1512711   | Ssc.26643.1.A1 at  | 100521910               |
| 447 | APLN                          | ↗                             | 1.1515021   | Ssc.3436.1.A1 at   | 100625006               |
| 448 | BD123                         | ↗                             | 1.1515585   | Ssc.26164.1.S1 at  | 100188899               |
| 449 | MUC5AC                        | ↗                             | 1.1522598   | Ssc.16035.1.S1 at  | 100170143               |
| 450 | TRAP1                         | ↗                             | 1.152323    | Ssc.23776.2.A1 at  | 100515536               |
| 451 | SPINT2                        | ↗                             | 1.1524436   | Ssc.9221.1.A1 at   | 100515207               |
| 452 | LENG8                         | ↗                             | 1.1531029   | Ssc.10310.1.A1 at  | 100524682               |
| 453 | NR2F1-AS1                     | ↗                             | 1.1533303   | Ssc.29939.1.S1 at  | 100739512               |
| 454 | ZNF268                        | ↗                             | 1.1536694   | Ssc.24014.1.S1 at  | 100154415               |
| 455 | SNX30                         | ↗                             | 1.1537154   | Ssc.26027.1.A1 at  | 100516535               |

|     | Gene symbol         | Regulation in low vs high WSS | Fold change | Probe set ID         | Entrez Gene ID          |
|-----|---------------------|-------------------------------|-------------|----------------------|-------------------------|
| 456 | GIMAP4              | ↗                             | 1.154642    | Scs.24714.1.A1 at    | 100518347               |
| 457 | PARP10              | ↗                             | 1.1549338   | Scs.29337.1.S1 at    | 100516730               |
| 458 | FAM113C             | ↗                             | 1.1560291   | Scs.7159.1.A1 at     | 100514992               |
| 459 | ATP6AP1             | ↗                             | 1.1574922   | Scs.24844.1.A1 at    | 100514338               |
| 460 | ERGIC1              | ↗                             | 1.1580459   | Scs.23508.2.S1 at    | 100523575               |
| 461 | TCRB                | ↗                             | 1.1585102   | Scs.11075.15.A1 a at | 100621664               |
| 462 | FGFR2IIIC           | ↗                             | 1.1587648   | Scs.15839.1.A1 at    | 396695                  |
| 463 | PACRG               | ↗                             | 1.1589947   | Scs.8104.2.A1 at     | 100623618               |
| 464 | BRI3BP              | ↗                             | 1.159981    | Scs.27497.1.A1 at    | 100155348               |
| 465 | HARBI1              | ↗                             | 1.1601418   | Scs.5597.2.A1 at     | 100516314               |
| 466 | ANOS                | ↗                             | 1.1612085   | Scs.19189.1.S1 at    | 100520542               |
| 467 | KATNA1              | ↗                             | 1.1621672   | Scs.29141.2.A1 at    | 100518101               |
| 468 | ACTR3               | ↗                             | 1.1631625   | Scs.8934.1.A1 at     | 396738                  |
| 469 | PRM1                | ↗                             | 1.1648579   | Scs.16223.1.S1 at    | 397487                  |
| 470 | NPY2R               | ↗                             | 1.1649932   | Scs.15963.1.S1 at    | 397291                  |
| 471 | ACOX3               | ↗                             | 1.1655188   | Scs.5024.1.A1 at     | 100523005               |
| 472 | SH3GL2              | ↗                             | 1.1655504   | Scs.21026.1.S1 at    | 100155580               |
| 473 | TCRA                | ↗                             | 1.1670271   | Scs.17808.1.A1 at    | 497055                  |
| 474 | TEDDM1              | ↗                             | 1.1692576   | Scs.4748.2.S1 at     | 100512916               |
| 475 | TFF1                | ↗                             | 1.1693053   | Scs.22946.1.S1 at    | 780401                  |
| 476 | ZNF786              | ↗                             | 1.1699095   | Scs.11355.1.A1 at    | 100522564               |
| 477 | TBP10               | ↗                             | 1.1714108   | Scs.7397.1.A1 at     | 397043                  |
| 478 | c1orf21             | ↗                             | 1.1717743   | Scs.12188.1.A1 at    | 100516567               |
| 479 | TMEM243             | ↗                             | 1.1721556   | Scs.24660.1.A1 at    | 100521508               |
| 480 | AGO2                | ↗                             | 1.1723416   | Scs.18916.1.A1 at    | 100155245               |
| 481 | EPAS1               | ↗                             | 1.1724627   | Scs.3921.1.S1 at     | 100037272               |
| 482 | ADAP1               | ↗                             | 1.1727148   | Scs.16178.1.S1 at    | 397453                  |
| 483 | UPK3BL              | ↗                             | 1.1727328   | Scs.6024.2.S1 at     | 100511499               |
| 484 | COL6A1              | ↗                             | 1.1729673   | Scs.5895.1.A1 at     | 100101553               |
| 485 | MFG8                | ↗                             | 1.1750984   | Scs.16345.1.S1 at    | 397545                  |
| 486 | SLC2A6              | ↗                             | 1.1752713   | Scs.11583.1.A1 at    | 100627201               |
| 487 | HS3ST3B1            | ↗                             | 1.1753402   | Scs.28368.1.A1 at    | 100522213 /// 100737777 |
| 488 | C9orf50             | ↗                             | 1.1756134   | Scs.21887.1.S1 at    | 100520534               |
| 489 | TMX1                | ↗                             | 1.175931    | Scs.6827.1.A1 at     | 100627887               |
| 490 | GNAO1               | ↗                             | 1.1760039   | Scs.21259.1.S1 at    | 100516976               |
| 491 | NCK2                | ↗                             | 1.1761718   | Scs.11693.1.A1 at    | 100192439               |
| 492 | EHMT2               | ↗                             | 1.1762805   | Scs.12499.1.A1 at    | 100124382               |
| 493 | MAPK11              | ↗                             | 1.1765591   | Scs.29722.1.S1 at    | N/A                     |
| 494 | CYP2C42             | ↗                             | 1.1776668   | Scs.16124.1.S1 a at  | 403111                  |
| 495 | HNF1B               | ↗                             | 1.1780761   | Scs.16447.1.S1 at    | 397002                  |
| 496 | CAR                 | ↗                             | 1.1823049   | Scs.13115.1.A1 at    | 397333                  |
| 497 | LY6G5C              | ↗                             | 1.1826866   | Scs.21798.2.S1 a at  | 100521803               |
| 498 | LOC100152387        | ↗                             | 1.18276     | Scs.18776.1.A1 at    | 100152387               |
| 499 | PPFIBP1             | ↗                             | 1.1837773   | Scs.11536.1.S1 at    | 100516194               |
| 500 | ZFP36L2//BRF2       | ↗                             | 1.183882    | Scs.2423.1.A1 at     | 100524530               |
| 501 | KRTAP26-1           | ↗                             | 1.184228    | Scs.20452.1.S1 at    | 100624997               |
| 502 | KNG1                | ↗                             | 1.1862148   | Scs.14075.1.A1 at    | 396568                  |
| 503 | GNL3L               | ↗                             | 1.186483    | Scs.3822.2.S1 at     | 100521120               |
| 504 | LOC100627367        | ↗                             | 1.1866461   | Scs.19833.1.S1 at    | 100627367               |
| 505 | COX8C               | ↗                             | 1.1871048   | Scs.25517.1.S1 at    | 100157935               |
| 506 | SYNDIG1L            | ↗                             | 1.1874386   | Scs.19269.1.S1 at    | 100737341               |
| 507 | NUP50               | ↗                             | 1.1887549   | Scs.1790.3.A1 at     | 100519837               |
| 508 | SPEG                | ↗                             | 1.1910249   | Scs.27402.1.A1 at    | 100737722               |
| 509 | HOXD9               | ↗                             | 1.1912377   | Scs.23551.1.S1 at    | 100517431               |
| 510 | HYDIN               | ↗                             | 1.1913779   | Scs.29504.1.A1 at    | 100513208               |
| 511 | LTN1                | ↗                             | 1.1930491   | Scs.13630.3.A1 at    | 106505847               |
| 512 | TCRA                | ↗                             | 1.1946489   | Scs.15850.1.S1 a at  | 497055                  |
| 513 | RBMA7               | ↗                             | 1.1949266   | Scs.9438.1.A1 at     | 100513606               |
| 514 | EFEMP2              | ↗                             | 1.1963735   | Scs.4267.3.S1 at     | 100526031               |
| 515 | NHE5///SLC9A5       | ↗                             | 1.1965882   | Scs.15982.1.A1 at    | 396753                  |
| 516 | NETO1//BCTL1//BTCL1 | ↗                             | 1.1967146   | Scs.19095.1.A1 at    | 100626670               |
| 517 | DR-1 beta chain     | ↗                             | 1.1967152   | Scs.16212.2.A1 x at  | 100153139               |
| 518 | CEP170              | ↗                             | 1.1967354   | Scs.14149.1.A1 at    | 100623007               |
| 519 | ADAT3               | ↗                             | 1.1980525   | Scs.24941.1.S1 at    | 100525631               |
| 520 | P2RX2               | ↗                             | 1.1986394   | Scs.19283.1.A1 at    | 100736581               |

|     | Gene symbol              | Regulation in low vs high WSS | Fold change | Probe set ID        | Entrez Gene ID          |
|-----|--------------------------|-------------------------------|-------------|---------------------|-------------------------|
| 521 | SIGLEC-1                 | ↗                             | 1.199109    | Ssc.17338.1.S1 at   | 397623                  |
| 522 | CEBPD                    | ↗                             | 1.1997335   | Ssc.10025.3.S1 at   | 100153946               |
| 523 | PRF1                     | ↗                             | 1.2001395   | Ssc.19693.1.A1 at   | 396595                  |
| 524 | KRTAP11-1                | ↗                             | 1.2011951   | Ssc.25697.1.S1 at   | 100626583               |
| 525 | C12orf52                 | ↗                             | 1.2014875   | Ssc.18225.3.S1 at   | 100523867               |
| 526 | UBXN10                   | ↗                             | 1.201903    | Ssc.12920.1.A1 at   | 100514294               |
| 527 | EPT1                     | ↗                             | 1.2024547   | Ssc.27288.1.S1 at   | 100512162               |
| 528 | LOC100622406             | ↗                             | 1.2036941   | Ssc.30191.1.A1 at   | N/A                     |
| 529 | WIPF2                    | ↗                             | 1.203806    | Ssc.24454.1.A1 at   | 100525252               |
| 530 | GIF                      | ↗                             | 1.2045074   | Ssc.15504.1.S1 at   | 100514273               |
| 531 | FLYWCH1                  | ↗                             | 1.205208    | Ssc.6143.2.S1 at    | 100736802               |
| 532 | TCRA                     | ↗                             | 1.2057694   | Ssc.17793.1.A1 at   | 497055                  |
| 533 | G6PD                     | ↗                             | 1.2058585   | Ssc.23537.1.S1 at   | 407058                  |
| 534 | TBX3                     | ↗                             | 1.2061691   | Ssc.28678.1.S1 at   | 100152741               |
| 535 | HNRPDL                   | ↗                             | 1.2063463   | Ssc.7731.1.A1 at    | 100511704               |
| 536 | IGSF9B                   | ↗                             | 1.206591    | Ssc.27100.1.A1 at   | 100626845               |
| 537 | B4GALT3                  | ↗                             | 1.2074867   | Ssc.16825.1.S1 at   | 100154856               |
| 538 | CD9                      | ↗                             | 1.2078965   | Ssc.54.1.A1 at      | 397067                  |
| 539 | PER1                     | ↗                             | 1.2085786   | Ssc.16979.2.A1 at   | 100620648               |
| 540 | ELSPBP1                  | ↗                             | 1.2088342   | Ssc.17775.1.S1 a at | 399529                  |
| 541 | WDR91                    | ↗                             | 1.2101955   | Ssc.25330.2.S1 at   | 100524054               |
| 542 | WDR27                    | ↗                             | 1.211905    | Ssc.19372.2.A1 at   | 100511666               |
| 543 | PPAP2C                   | ↗                             | 1.2128613   | Ssc.4862.1.A1 at    | 100233200               |
| 544 | WDTC1                    | ↗                             | 1.2138182   | Ssc.11356.1.A1 at   | 100190994               |
| 545 | CRYBB1                   | ↗                             | 1.2143898   | Ssc.22340.1.S1 at   | 780429                  |
| 546 | OATV1                    | ↗                             | 1.2151083   | Ssc.17335.1.S1 at   | 397621                  |
| 547 | FXD3                     | ↗                             | 1.2165403   | Ssc.569.1.S1 at     | 397413                  |
| 548 | PTOV1                    | ↗                             | 1.216926    | Ssc.21379.1.S1 at   | 100522621               |
| 549 | CXXC5                    | ↗                             | 1.2170271   | Ssc.9048.2.A1 at    | 100524854               |
| 550 | PDZK1IP1                 | ↗                             | 1.2173697   | Ssc.19735.1.S1 at   | 414756                  |
| 551 | FGF7                     | ↗                             | 1.2184622   | Ssc.15923.1.S1 at   | 397281                  |
| 552 | ROGDI                    | ↗                             | 1.2184838   | Ssc.2167.3.A1 at    | 100525282               |
| 553 | AMIGO3                   | ↗                             | 1.2199185   | Ssc.20781.2.S1 at   | 100625501               |
| 554 | PRDX5                    | ↗                             | 1.220114    | Ssc.460.1.S1 at     | 397273                  |
| 555 | RRP4                     | ↗                             | 1.2211516   | Ssc.31177.1.S1 at   | 100523112               |
| 556 | EPB41L1                  | ↗                             | 1.2226721   | Ssc.2070.1.S1 at    | 100156952               |
| 557 | SERPINB1                 | ↗                             | 1.2228085   | Ssc.26522.1.A1 at   | 100155145               |
| 558 | EMSP1                    | ↗                             | 1.2231773   | Ssc.11.1.S1 at      | 396720                  |
| 559 | BRI3BP                   | ↗                             | 1.2248338   | Ssc.26416.1.A1 at   | 100155348               |
| 560 | DEDD                     | ↗                             | 1.2253324   | Ssc.1294.2.S1 at    | 100156474               |
| 561 | FBXO44                   | ↗                             | 1.2254227   | Ssc.5427.1.A1 at    | 100524444               |
| 562 | GMEB2                    | ↗                             | 1.2257701   | Ssc.16417.1.A1 at   | N/A                     |
| 563 | OXT                      | ↗                             | 1.2259587   | Ssc.15668.1.A1 at   | 100152272               |
| 564 | CDX2                     | ↗                             | 1.2272046   | Ssc.24504.1.S1 at   | 100127132               |
| 565 | GPC4                     | ↗                             | 1.2272341   | Ssc.29487.1.A1 at   | 100156029               |
| 566 | OIP5//protein Mis18-beta | ↗                             | 1.2276815   | Ssc.24992.1.S1 at   | 100516409 /// 100621171 |
| 567 | Rab-3D                   | ↗                             | 1.2292842   | Ssc.11705.2.A1 at   | 100516180               |
| 568 | NFAT                     | ↗                             | 1.2292883   | Ssc.16122.1.S1 at   | 100134969 /// 396824    |
| 569 | GARNL3                   | ↗                             | 1.2294141   | Ssc.19598.2.A1 at   | 100156351               |
| 570 | ADCY1                    | ↗                             | 1.2295872   | Ssc.26388.1.S1 at   | 100624934               |
| 571 | EDNRA                    | ↗                             | 1.2300621   | Ssc.16189.1.S1 at   | 397457                  |
| 572 | PHYHD1                   | ↗                             | 1.2306986   | Ssc.22015.2.S1 at   | 100157556               |
| 573 | C19orf54                 | ↗                             | 1.2318456   | Ssc.21879.1.S1 at   | 100524024               |
| 574 | FHOD3                    | ↗                             | 1.2323215   | Ssc.17896.2.S1 at   | 100622006               |
| 575 | CRYGF                    | ↗                             | 1.2325692   | Ssc.6779.1.S1 at    | 100522220               |
| 576 | COUP-TF1///NR2F1         | ↗                             | 1.2343899   | Ssc.3282.2.A1 at    | 100621562               |
| 577 | GNAI1                    | ↗                             | 1.2352043   | Ssc.16259.1.A1 at   | 397505                  |
| 578 | PANK3                    | ↗                             | 1.2365003   | Ssc.24636.1.A1 at   | 100512746               |
| 579 | TMEM82                   | ↗                             | 1.2371538   | Ssc.26115.1.S1 at   | 100522322               |
| 580 | BLG                      | ↗                             | 1.2388949   | Ssc.11136.1.S1 at   | 396596                  |
| 581 | GAD2                     | ↗                             | 1.2393881   | Ssc.5021.1.S1 at    | 396929                  |
| 582 | RBP1                     | ↗                             | 1.2396388   | Ssc.5563.2.S1 a at  | 100156666               |
| 583 | CYP2C42                  | ↗                             | 1.2400304   | Ssc.16124.1.A1 a at | 403111                  |
| 584 | ZNF22                    | ↗                             | 1.2415313   | Ssc.7980.1.A1 at    | 100739086               |
| 585 | FAM20C                   | ↗                             | 1.2439616   | Ssc.4698.1.A1 at    | 100628219               |



|     | Gene symbol                | Regulation in low vs high WSS | Fold change | Probe set ID        | Entrez Gene ID          |
|-----|----------------------------|-------------------------------|-------------|---------------------|-------------------------|
| 586 | ARSJ                       | ↗                             | 1.2458606   | Ssc.3579.1.A1 at    | 100512548               |
| 587 | GEMIN5                     | ↗                             | 1.2461165   | Ssc.27501.1.S1 at   | 100524914               |
| 588 | BPGM                       | ↗                             | 1.2473524   | Ssc.22500.1.S1 at   | 100525495               |
| 589 | LHCGR                      | ↗                             | 1.2473683   | Ssc.16311.1.A1 a at | 407247                  |
| 590 | CCDC51                     | ↗                             | 1.2479284   | Ssc.18683.1.S1 at   | 100521222               |
| 591 | SNAP91/ or AP180           | ↗                             | 1.2484759   | Ssc.10571.1.S1 at   | 100521763               |
| 592 | PLB1                       | ↗                             | 1.2498362   | Ssc.30851.1.S1 at   | 100519306               |
| 593 | RHOF                       | ↗                             | 1.2503896   | Ssc.2019.3.S1 at    | 100144500               |
| 594 | CHN1                       | ↗                             | 1.2514935   | Ssc.23258.1.S1 at   | 100627143               |
| 595 | CELF4                      | ↗                             | 1.2517583   | Ssc.22048.3.A1 at   | 100521138               |
| 596 | RCD1                       | ↗                             | 1.2522762   | Ssc.21425.1.S1 at   | 100153939               |
| 597 | LCLAT1                     | ↗                             | 1.2532785   | Ssc.24706.1.A1 at   | 100217396               |
| 598 | Obs1                       | ↗                             | 1.2548671   | Ssc.27615.2.S1 a at | 100624019               |
| 599 | RBM12B                     | ↗                             | 1.2553035   | Ssc.13106.1.S1 at   | 100514101               |
| 600 | SLAMF9///CD84-H1///CD2F-10 | ↗                             | 1.2559308   | Ssc.11060.2.S1 at   | 100525572               |
| 601 | SLC24A4                    | ↗                             | 1.2565199   | Ssc.12721.1.A1 at   | 100156914               |
| 602 | PLOD1                      | ↗                             | 1.2576838   | Ssc.23519.1.S1 at   | 100525583               |
| 603 | FGFBP3                     | ↗                             | 1.258201    | Ssc.23917.1.A1 at   | 100153311               |
| 604 | VCP                        | ↗                             | 1.2586975   | Ssc.27050.2.A1 at   | 100624357               |
| 605 | SMG6                       | ↗                             | 1.2589691   | Ssc.28383.1.S1 at   | 100511407               |
| 606 | TEF1                       | ↗                             | 1.2592355   | Ssc.15152.2.S1 at   | 100216478               |
| 607 | OCA2                       | ↗                             | 1.2593017   | Ssc.15775.1.S1 at   | 397171                  |
| 608 | PNLIPRP2                   | ↗                             | 1.2596288   | Ssc.18827.1.A1 at   | 100462755               |
| 609 | ELK3                       | ↗                             | 1.2597055   | Ssc.15671.1.S1 at   | 100622445               |
| 610 | CXCL2                      | ↗                             | 1.2624699   | Ssc.24282.2.S1 at   | 396594                  |
| 611 | FBLN7                      | ↗                             | 1.2629337   | Ssc.6510.1.A1 at    | 100517582               |
| 612 | KCNH2                      | ↗                             | 1.263125    | Ssc.30718.1.A1 at   | 100523293               |
| 613 | UPK2                       | ↗                             | 1.2638063   | Ssc.70.1.S1 at      | 397075                  |
| 614 | CITED4                     | ↗                             | 1.2643626   | Ssc.9605.1.A1 at    | 100525468               |
| 615 | OPRL1                      | ↗                             | 1.2649717   | Ssc.16086.1.S1 at   | 397364                  |
| 616 | PROM2                      | ↗                             | 1.2656176   | Ssc.27157.2.S1 at   | 100521959               |
| 617 | UTS2                       | ↗                             | 1.2664226   | Ssc.437.1.S1 a at   | 397268                  |
| 618 | CACNB2                     | ↗                             | 1.2673753   | Ssc.10614.1.A1 at   | 100524101               |
| 619 | POLM                       | ↗                             | 1.2677318   | Ssc.19244.2.A1 at   | 100515113               |
| 620 | PVRL1                      | ↗                             | 1.2685801   | Ssc.15891.1.S1 at   | 397247                  |
| 621 | KIAA1737                   | ↗                             | 1.2690537   | Ssc.12687.1.A1 at   | 100157174               |
| 622 | UBQLN1                     | ↗                             | 1.2702641   | Ssc.23541.1.S1 at   | 100622592               |
| 623 | B4GALNT1                   | ↗                             | 1.2702726   | Ssc.14898.3.S1 at   | 100516440               |
| 624 | CD42EP2                    | ↗                             | 1.2709657   | Ssc.5357.2.S1 at    | 100513778               |
| 625 | PVRL1                      | ↗                             | 1.2735168   | Ssc.6982.2.S1 at    | 397247                  |
| 626 | RANBP2                     | ↗                             | 1.2738378   | Ssc.21677.1.S1 at   | 100511376               |
| 627 | ELK3                       | ↗                             | 1.2739894   | Ssc.4212.2.S1 at    | 100622445               |
| 628 | OX-2///MRC///CD200         | ↗                             | 1.2767805   | Ssc.13223.1.A1 at   | 100517427///100626182   |
| 629 | PUS1                       | ↗                             | 1.2792598   | Ssc.22201.2.S1 a at | 100157224               |
| 630 | LRCH2                      | ↗                             | 1.2798992   | Ssc.13457.1.A1 at   | 100155794               |
| 631 | DHX36                      | ↗                             | 1.2807215   | Ssc.22088.2.A1 at   | 100626674               |
| 632 | FOXA1                      | ↗                             | 1.2819997   | Ssc.26021.1.S1 at   | 100156502               |
| 633 | SLC22A17                   | ↗                             | 1.2849393   | Ssc.2181.2.A1 a at  | 100152841               |
| 634 | SLC38A1                    | ↗                             | 1.2854768   | Ssc.28490.2.A1 at   | 100154364               |
| 635 | ELK3                       | ↗                             | 1.2874928   | Ssc.4212.1.A1 at    | 100622445               |
| 636 | KIFC1                      | ↗                             | 1.2880796   | Ssc.25117.1.A1 at   | 100154627 /// 100737015 |
| 637 | POLRMT                     | ↗                             | 1.2889692   | Ssc.4451.2.S1 at    | N/A                     |
| 638 | MUC16                      | ↗                             | 1.2907802   | Ssc.30342.1.A1 at   | 100624460               |
| 639 | DCLK2                      | ↗                             | 1.292085    | Ssc.12389.1.A1 s at | 100520394               |
| 640 | ATP10B                     | ↗                             | 1.2939444   | Ssc.5545.1.S1 at    | 100626997               |
| 641 | URM1                       | ↗                             | 1.2939484   | Ssc.8888.1.A1 at    | 100153888               |
| 642 | PAQR3                      | ↗                             | 1.294048    | Ssc.24474.1.A1 at   | 100514591               |
| 643 | MYO5B                      | ↗                             | 1.2966125   | Ssc.10382.1.A1 at   | 100521829               |
| 644 | HOX7/MSX1                  | ↗                             | 1.3002042   | Ssc.9355.2.A1 at    | 100302364               |
| 645 | KIAA0146/SPIDR             | ↗                             | 1.3021438   | Ssc.27496.2.S1 a at | 100153946               |
| 646 | CSRNP2                     | ↗                             | 1.3033892   | Ssc.8048.1.S1 at    | N/A                     |
| 647 | SSU72                      | ↗                             | 1.3046336   | Ssc.27067.1.A1 at   | 100525522               |
| 648 | ZNF697                     | ↗                             | 1.3056176   | Ssc.9659.1.A1 at    | 100154558               |
| 649 | RCD1                       | ↗                             | 1.3061107   | Ssc.21425.2.S1 at   | 100153939               |
| 650 | LOC100518881               | ↗                             | 1.3071729   | Ssc.25612.1.S1 at   | 100518881               |

|     | Gene symbol  | Regulation in low vs high WSS | Fold change | Probe set ID        | Entrez Gene ID       |
|-----|--------------|-------------------------------|-------------|---------------------|----------------------|
| 651 | FAM183A      | ↗                             | 1.3072073   | Scs.30511.1.A1_at   | 100520438            |
| 652 | FAM129C      | ↗                             | 1.3077534   | Scs.6341.3.A1_at    | 100517808            |
| 653 | GLYR1        | ↗                             | 1.3082824   | Scs.18242.2.A1_at   | 100525456            |
| 654 | Obsl1        | ↗                             | 1.3089406   | Scs.27615.1.S1_at   | 100624019            |
| 655 | MYLPF        | ↗                             | 1.3096435   | Scs.20141.1.S1_at   | 474162               |
| 656 | TMEM9        | ↗                             | 1.3104694   | Scs.9010.1.A1_at    | 100621878            |
| 657 | TMSB4X       | ↗                             | 1.3108249   | Scs.27304.3.S1_s_at | 733606//100216317    |
| 658 | HYAL3        | ↗                             | 1.3109261   | Scs.26118.1.S1_at   | 404696               |
| 659 | TCEAL3       | ↗                             | 1.3131984   | Scs.21736.1.S1_at   | 100524295            |
| 660 | PDE4A        | ↗                             | 1.3147727   | Scs.16123.2.S1_at   | 396825               |
| 661 | NPPC         | ↗                             | 1.3153703   | Scs.23867.1.A1_at   | 493772               |
| 662 | CACNA1C      | ↗                             | 1.3199488   | Scs.4599.1.A1_at    | 100518733            |
| 663 | TMEM9        | ↗                             | 1.3199672   | Scs.19052.1.S1_s_at | 100621878            |
| 664 | LARP1B       | ↗                             | 1.3212991   | Scs.7941.1.A1_at    | 100621145//100516502 |
| 665 | PGM3         | ↗                             | 1.3231328   | Scs.4307.1.A1_at    | 100156015            |
| 666 | HIF1A        | ↗                             | 1.3235685   | Scs.5542.1.A1_at    | 396696               |
| 667 | RCE1         | ↗                             | 1.3236566   | Scs.5482.1.S1_at    | 100514389            |
| 668 | GCLC         | ↗                             | 1.3260359   | Scs.29035.1.S1_at   | 100522018            |
| 669 | MLPH         | ↗                             | 1.3264482   | Scs.13047.1.A1_at   | 100049680            |
| 670 | GCM1         | ↗                             | 1.328211    | Scs.27605.1.A1_at   | 414910               |
| 671 | GRAMD1B      | ↗                             | 1.330685    | Scs.30948.1.S1_at   | 100512979            |
| 672 | WDR26        | ↗                             | 1.3406295   | Scs.25783.1.S1_at   | 100523327            |
| 673 | EDNRB        | ↗                             | 1.3435119   | Scs.4436.1.S1_at    | 414911               |
| 674 | SLC2A3       | ↗                             | 1.3472246   | Scs.1674.1.A1_at    | 100626468            |
| 675 | SYT2         | ↗                             | 1.3483729   | Scs.12033.1.A1_at   | 100511582            |
| 676 | CPXM1        | ↗                             | 1.348984    | Scs.30175.1.A1_at   | 100512144            |
| 677 | MAP4K4       | ↗                             | 1.3508885   | Scs.3574.1.A1_at    | 100516547            |
| 678 | FBLN7        | ↗                             | 1.3561664   | Scs.13129.1.S1_at   | 102162371//100517582 |
| 679 | TRABD        | ↗                             | 1.360528    | Scs.2473.1.S1_at    | 100519151            |
| 680 | APLNR        | ↗                             | 1.363571    | Scs.28818.2.S1_at   | N/A                  |
| 681 | HOOK1        | ↗                             | 1.3717499   | Scs.27144.1.A1_at   | 100525467            |
| 682 | LOC100515911 | ↗                             | 1.3733765   | Scs.489.1.A1_at     | 100515911            |
| 683 | SPRYD4       | ↗                             | 1.3752017   | Scs.26129.2.S1_at   | 100522549            |
| 684 | EGFL8        | ↗                             | 1.3766663   | Scs.3386.1.A1_at    | 100144521            |
| 685 | SL44-1//TP23 | ↗                             | 1.3772082   | ScsAffx.2.1.S1_a_at | 100049648//100113399 |
| 686 | GPC4         | ↗                             | 1.3776945   | Scs.29046.1.S1_at   | 100156029            |
| 687 | SYP          | ↗                             | 1.378416    | Scs.2798.1.S1_at    | 100512029            |
| 688 | DUSP14       | ↗                             | 1.3805935   | Scs.4140.1.A1_at    | 100623524            |
| 689 | POC1B        | ↗                             | 1.391997    | Scs.7790.1.S1_at    | 102161501            |
| 690 | SLC6A8       | ↗                             | 1.4038124   | Scs.2555.1.S1_at    | 100302506            |
| 691 | PPAG3        | ↗                             | 1.4113176   | Scs.15906.1.S1_at   | 396731               |
| 692 | HSPA8        | ↗                             | 1.4163022   | Scs.19203.3.S1_at   | 100511890            |
| 693 | ISYNA1       | ↗                             | 1.4261355   | Scs.15723.1.S1_at   | 102164826            |
| 694 | BTBD9        | ↗                             | 1.4316114   | Scs.18243.2.S1_at   | 100156900            |
| 695 | SOCS1        | ↗                             | 1.4342244   | Scs.26216.1.S1_at   | 100307052            |
| 696 | THRB         | ↗                             | 1.4385114   | Scs.18017.1.A1_at   | 396776               |
| 697 | CEACAM16     | ↗                             | 1.4467767   | Scs.6653.1.S1_at    | 100524994            |
| 698 | APOA1        | ↗                             | 1.4504682   | Scs.807.1.S1_at     | 397691               |
| 699 | GNL2         | ↗                             | 1.4668972   | Scs.25247.1.S1_at   | 100623150            |
| 700 | UGCG         | ↗                             | 1.4696635   | Scs.17674.1.A1_at   | 100152737            |
| 701 | DDX56        | ↗                             | 1.4734495   | Scs.1418.2.S1_at    | 100513388            |
| 702 | LMNA         | ↗                             | 1.477065    | Scs.944.1.A1_at     | 100126859            |
| 703 | CHST3        | ↗                             | 1.4915618   | Scs.19021.1.A1_at   | 100151968            |
| 704 | QSOX1        | ↗                             | 1.4988298   | Scs.22049.2.S1_at   | 100620285//100524948 |
| 705 | ATP6V1C2     | ↗                             | 1.5039257   | Scs.14999.1.A1_at   | 100512277            |
| 706 | MSN          | ↗                             | 1.5053484   | Scs.14470.1.S1_at   | 494458               |
| 707 | MYH10        | ↗                             | 1.5057305   | Scs.16320.1.S1_at   | 396903               |
| 708 | LPPR3        | ↗                             | 1.5059197   | Scs.30674.1.S1_at   | 100511492            |
| 709 | PEG10        | ↗                             | 1.5084172   | Scs.13476.1.A1_at   | 654416               |
| 710 | F11R         | ↗                             | 1.5191276   | Scs.29060.1.S1_at   | 100127138            |
| 711 | SPCS3        | ↗                             | 1.5228368   | Scs.25099.2.A1_at   | 100526140            |
| 712 | HOXA1        | ↗                             | 1.5344396   | Scs.24582.1.S1_at   | 100520162            |
| 713 | WNK1         | ↗                             | 1.5369571   | Scs.21658.1.S1_at   | 406235               |
| 714 | GPR4         | ↗                             | 1.5376071   | Scs.5191.1.S1_at    | 100144489            |
| 715 | CACHD1       | ↗                             | 1.5380137   | Scs.16511.1.A1_at   | 100522413            |

|     | Gene symbol     | Regulation in low vs high WSS | Fold change | Probe set ID        | Entrez Gene ID        |
|-----|-----------------|-------------------------------|-------------|---------------------|-----------------------|
| 716 | MPP6            | ↗                             | 1.5437312   | Scs.25376.1.S1 at   | 100523707             |
| 717 | DOCK7           | ↗                             | 1.5455594   | Scs.12264.1.A1 at   | 100524027             |
| 718 | FGL2            | ↗                             | 1.5498251   | ScsAffx.9.1.S1 at   | 448808                |
| 719 | PLEK2           | ↗                             | 1.5514617   | Scs.5696.1.S1 at    | 100154251             |
| 720 | PLSCR4          | ↗                             | 1.5515579   | Scs.8585.1.A1 at    | 100518400             |
| 721 | COL5A1-like     | ↗                             | 1.5694759   | Scs.4993.1.A1 at    | 100517021             |
| 722 | MED24           | ↗                             | 1.572418    | Scs.2777.1.S1 at    | 100511100             |
| 723 | MPP6            | ↗                             | 1.572611    | Scs.25098.1.S1 at   | 100523707             |
| 724 | C14orf37        | ↗                             | 1.5760218   | Scs.17533.1.A1 at   | 100514619             |
| 725 | APLN            | ↗                             | 1.5916635   | Scs.28818.2.S1 a at | N/A                   |
| 726 | RANBP6          | ↗                             | 1.5917401   | Scs.12070.1.A1 at   | 100518819             |
| 727 | SLIT2           | ↗                             | 1.5942512   | Scs.18000.1.A1 at   | 100515328             |
| 728 | PDXK            | ↗                             | 1.5953624   | Scs.11170.1.S1 at   | 396983                |
| 729 | VEGFA           | ↗                             | 1.6028883   | Scs.15740.1.S2 at   | 100737169             |
| 730 | QPRT            | ↗                             | 1.6068634   | Scs.21948.1.S1 at   | 100623339             |
| 731 | TGFBR3          | ↗                             | 1.6085724   | Scs.1176.1.A1 at    | 397512                |
| 732 | CKAP4           | ↗                             | 1.6154914   | Scs.2147.1.A1 at    | 100523493             |
| 733 | TFF2            | ↗                             | 1.6292584   | Scs.650.1.S1 at     | 397420                |
| 734 | VEGFA           | ↗                             | 1.629887    | Scs.15740.2.S1 a at | 397157                |
| 735 | PIM3            | ↗                             | 1.6491135   | Scs.26274.1.S1 at   | 100521016             |
| 736 | GBI1/GNAI1      | ↗                             | 1.6505636   | Scs.4159.1.A1 at    | 100144419             |
| 737 | SOC1            | ↗                             | 1.6602714   | Scs.9016.1.A1 at    | 100307052             |
| 738 | TCTN3           | ↗                             | 1.6613333   | Scs.5488.1.S1 at    | 100157208             |
| 739 | HIC2            | ↗                             | 1.6657511   | Scs.2117.1.S1 at    | 100151900             |
| 740 | LMNA            | ↗                             | 1.6698565   | Scs.5112.1.S1 at    | 100126859             |
| 741 | YRDC            | ↗                             | 1.6826388   | Scs.18351.1.A1 at   | N/A                   |
| 742 | ACOT4           | ↗                             | 1.6855203   | Scs.18475.3.A1 at   | 100158115             |
| 743 | CYP7B1          | ↗                             | 1.702667    | Scs.24330.1.S1 at   | 100286867             |
| 744 | TAF9            | ↗                             | 1.704668    | Scs.10395.1.A1 at   | 100516765             |
| 745 | GPX3            | ↗                             | 1.7121379   | Scs.19694.1.S1 at   | 396598                |
| 746 | MTHFD1L         | ↗                             | 1.7407426   | Scs.9594.1.A1 at    | 100154722             |
| 747 | SH3GL2          | ↗                             | 1.742462    | Scs.11014.1.S1 at   | 100523947             |
| 748 | ATP6V1C2        | ↗                             | 1.7488481   | Scs.31160.1.A1 s at | 100512277             |
| 749 | HIF1A           | ↗                             | 1.7536794   | Scs.390.1.A1 at     | 396696                |
| 750 | B4GALNT1        | ↗                             | 1.7606215   | Scs.14898.2.S1 at   | 100516440             |
| 751 | C10QNF1///ASGR2 | ↗                             | 1.7689973   | Scs.16889.1.S1 at   | 100217377///100739379 |
| 752 | AUTS2           | ↗                             | 1.7699014   | Scs.4018.1.S1 at    | 100515476///100515305 |
| 753 | COL5A1          | ↗                             | 1.7749091   | Scs.9002.1.A1 at    | 100517021             |
| 754 | HIF1A           | ↗                             | 1.7991      | Scs.390.2.S1 at     | 396696                |
| 755 | HEXIM1          | ↗                             | 1.8042284   | Scs.5567.1.S1 at    | 100520763             |
| 756 | FAM176A         | ↗                             | 1.818726    | Scs.4914.1.A1 at    | 100510899             |
| 757 | MMP11           | ↗                             | 1.823085    | Scs.12514.1.A1 at   | 100153503             |
| 758 | SULT1A1         | ↗                             | 1.8380601   | Scs.20006.1.S1 at   | 396640                |
| 759 | MFF             | ↗                             | 1.8573767   | Scs.13356.1.A1 at   | 100513442             |
| 760 | ENO2            | ↗                             | 1.8645983   | Scs.3743.1.S1 at    | 100157750             |
| 761 | FGL2            | ↗                             | 1.8646586   | Scs.22050.1.S1 s at | 448808                |
| 762 | SPRED3          | ↗                             | 1.8792586   | Scs.11998.1.A1 at   | 100515836             |
| 763 | NR2F2           | ↗                             | 1.8818611   | Scs.1205.1.S1 at    | 100153983             |
| 764 | CCT2            | ↗                             | 1.897664    | Scs.27956.1.S1 at   | 100157776             |
| 765 | SBNO2           | ↗                             | 1.916344    | Scs.15443.1.S1 at   | 100623993             |
| 766 | SERPINI1        | ↗                             | 1.9305116   | Scs.6948.1.A1 at    | 100154352             |
| 767 | LOC100519434    | ↗                             | 1.9326838   | Scs.23518.1.S1 at   | 100519434             |
| 768 | FAM162B         | ↗                             | 1.9403174   | Scs.6162.1.A1 at    | 100152527             |
| 769 | SDC4            | ↗                             | 1.9517932   | Scs.17671.1.S1 at   | 100513446             |
| 770 | BEX4            | ↗                             | 1.9586672   | Scs.15648.1.S1 at   | 100627578             |
| 771 | GLRB            | ↗                             | 1.9608474   | Scs.6613.2.S1 at    | 414284                |
| 772 | PLSCR4          | ↗                             | 1.9621781   | Scs.23099.1.S1 at   | 100518400             |
| 773 | PTGES           | ↗                             | 1.9849402   | Scs.1310.1.S1 at    | 654407                |
| 774 | DAAM1           | ↗                             | 1.9917033   | Scs.6363.1.A1 at    | 100517445             |
| 775 | CNKSR3          | ↗                             | 2.0014892   | Scs.19060.1.A1 at   | 100513248             |
| 776 | FBXL21          | ↗                             | 2.0188441   | Scs.28616.1.S1 at   | 100517085             |
| 777 | C14orf37        | ↗                             | 2.0270092   | Scs.6265.1.S1 at    | 100514619             |
| 778 | SEMA6A          | ↗                             | 2.080907    | Scs.8359.2.A1 at    | 100522008             |
| 779 | SDC4            | ↗                             | 2.1011586   | Scs.16324.1.S1 at   | 397528                |
| 780 | FBXL21          | ↗                             | 2.1066568   | Scs.22965.1.S1 at   | 100738540             |

|     | Gene symbol      | Regulation in low vs high WSS | Fold change | Probe set ID        | Entrez Gene ID          |
|-----|------------------|-------------------------------|-------------|---------------------|-------------------------|
| 781 | FZD4             | ↗                             | 2.1126251   | Scs.1093.1.A1 at    | 100520319               |
| 782 | RGMB             | ↗                             | 2.1185      | Scs.24542.1.S1 at   | 100525212               |
| 783 | TNIP1            | ↗                             | 2.1350734   | Scs.1758.2.S1 at    | 100271903               |
| 784 | CRISPLD1         | ↗                             | 2.1435142   | Scs.5995.1.A1 at    | 100152961               |
| 785 | CCDC146          | ↗                             | 2.1511903   | Scs.30397.1.A1 at   | 100515400               |
| 786 | KIF1A            | ↗                             | 2.154493    | Scs.21055.1.S1 at   | 100517246               |
| 787 | ZDHHC9//CREB1    | ↗                             | 2.1780782   | Scs.5382.1.A1 at    | 397449                  |
| 788 | CFD              | ↗                             | 2.2085614   | Scs.11074.1.S1 at   | 396877                  |
| 789 | CCDC3            | ↗                             | 2.2272286   | Scs.6478.2.S1 at    | 100510975               |
| 790 | LGALS1           | ↗                             | 2.2496119   | Scs.1320.1.A1 at    | 414915                  |
| 791 | NR2F2            | ↗                             | 2.2973657   | Scs.8676.1.S1 at    | 100153983               |
| 792 | MT1A             | ↗                             | 2.308658    | Scs.16125.1.S1_x at | 397417                  |
| 793 | COL3A1           | ↗                             | 2.3442357   | Scs.11302.1.S2 at   | 100152001               |
| 794 | ODZ1             | ↗                             | 2.3673534   | Scs.27124.1.A1 at   | 100512817               |
| 795 | C13orf33         | ↗                             | 2.3995767   | Scs.29441.1.A1 at   | 100153765               |
| 796 | EBI3             | ↗                             | 2.406718    | Scs.22203.1.A1 at   | 100522599               |
| 797 | ZDHHC9//CREB1    | ↗                             | 2.429038    | Scs.5382.1.A1_a at  | 397449                  |
| 798 | MT2B             | ↗                             | 2.4343574   | Scs.15640.1.S1 at   | 396827                  |
| 799 | C5orf49          | ↗                             | 2.437258    | Scs.949.1.S1 at     | 100516406               |
| 800 | DCBLD2///ST3GAL6 | ↗                             | 2.4527943   | Scs.974.1.S1 at     | 106504106///100739492   |
| 801 | KIRREL3          | ↗                             | 2.4736516   | Scs.8469.1.A1 at    | 100515566               |
| 802 | OAF              | ↗                             | 2.4834223   | Scs.3626.1.S1 at    | 100522940               |
| 803 | PLXNB2           | ↗                             | 2.5031343   | Scs.4084.1.S1 at    | N/A                     |
| 804 | C11ORF96         | ↗                             | 2.5595481   | Scs.17312.1.A1 at   | N/A                     |
| 805 | LNX1             | ↗                             | 2.566624    | Scs.6738.1.S1 at    | 100523319               |
| 806 | PERP             | ↗                             | 2.578564    | Scs.11670.2.S1 at   | 100737354               |
| 807 | MASP1            | ↗                             | 2.5849395   | Scs.18836.1.A1 at   | 100152125               |
| 808 | FAM162B          | ↗                             | 2.5934143   | Scs.6162.2.S1 at    | 100152527               |
| 809 | INHBA            | ↗                             | 2.5974898   | Scs.8555.1.A1 at    | 100517068               |
| 810 | PDCD2L           | ↗                             | 2.606395    | Scs.3994.2.S1 at    | 100512169               |
| 811 | INHBA            | ↗                             | 2.642614    | Scs.17133.1.A1 at   | 100517068               |
| 812 | HEBP2            | ↗                             | 2.7178597   | Scs.12634.1.S1 at   | 100155860               |
| 813 | PDGFRA           | ↗                             | 2.7331629   | Scs.13288.1.A1 at   | 100524633               |
| 814 | COL3A1           | ↗                             | 2.7345514   | Scs.11302.1.S1 at   | 100152001               |
| 815 | GYG1             | ↗                             | 2.7369404   | Scs.4204.1.S1 at    | 100520641               |
| 816 | TMEM30B          | ↗                             | 2.771129    | Scs.26634.1.A1 at   | 100738730               |
| 817 | IGF1             | ↗                             | 2.787531    | Scs.16231.3.S1_a at | 397491                  |
| 818 | SLIT2            | ↗                             | 2.7902956   | Scs.24342.2.A1 at   | 100516326               |
| 819 | PFN2             | ↗                             | 2.83466     | Scs.8274.1.A1 at    | 100621523               |
| 820 | FZD5             | ↗                             | 2.9598398   | Scs.29483.1.A1 at   | 100519058               |
| 821 | PSAT1            | ↗                             | 2.9640298   | Scs.19839.1.S1 at   | 100154160               |
| 822 | CAPNS1 /// GPX3  | ↗                             | 2.9742532   | Scs.7158.1.A1_a at  | 396598                  |
| 823 | GLRB             | ↗                             | 2.9794476   | Scs.6613.1.A1 at    | 414284                  |
| 824 | SLIT2            | ↗                             | 3.0029802   | Scs.7743.1.A1 at    | 100620577               |
| 825 | IL4R             | ↗                             | 3.0874224   | Scs.6256.1.A1 at    | 397614                  |
| 826 | FZD5             | ↗                             | 3.1512866   | Scs.13439.1.A1 at   | 100519058               |
| 827 | MT1A             | ↗                             | 3.236157    | Scs.600.1.S1_s at   | 397417                  |
| 828 | GATA4            | ↗                             | 3.4314933   | Scs.3566.2.A1 at    | 397555                  |
| 829 | IGF1             | ↗                             | 3.4831822   | Scs.16231.1.S1_a at | 397491                  |
| 830 | LOC100738697     | ↗                             | 3.5855603   | Scs.26466.1.A1 at   | 100738697               |
| 831 | PTPN13           | ↗                             | 3.6742935   | Scs.9101.1.A1 at    | 100521910               |
| 832 | vof16            | ↗                             | 3.692876    | Scs.23827.1.A1 at   | N/A                     |
| 833 | BMP2             | ↗                             | 3.7096426   | Scs.29004.1.S1 at   | 100152318 /// 100157103 |
| 834 | SIX1             | ↗                             | 3.7122993   | Scs.15233.1.S1 at   | 100156847               |
| 835 | CCL2             | ↗                             | 3.7170718   | Scs.657.1.A1 at     | 397422                  |
| 836 | DSP              | ↗                             | 3.7226565   | Scs.1623.1.S1 at    | 100156744               |
| 837 | IGF1             | ↗                             | 3.8359864   | Scs.12578.1.A1 at   | 397491                  |
| 838 | SCG5             | ↗                             | 3.8957596   | Scs.155.1.S1 at     | 397110                  |
| 839 | CCDC3            | ↗                             | 3.9688344   | Scs.6478.1.A1 at    | 100510975               |
| 840 | IGF1             | ↗                             | 3.9869041   | Scs.31130.1.A1 at   | 397491                  |
| 841 | LRFN5            | ↗                             | 4.080709    | Scs.26533.1.A1 at   | 100156782               |
| 842 | HAND2            | ↗                             | 4.092096    | Scs.31068.1.A1 at   | 100153751               |
| 843 | FBN2             | ↗                             | 4.125346    | Scs.27703.1.S1 at   | 100048956               |
| 844 | ANGPTL4          | ↗                             | 4.150375    | Scs.17345.1.S1 at   | 397628                  |
| 845 | IGF1             | ↗                             | 4.3058763   | Scs.25004.1.S1 at   | 397491                  |

|     | Gene symbol | Regulation in low vs high WSS | Fold change | Probe set ID      | Entrez Gene ID        |
|-----|-------------|-------------------------------|-------------|-------------------|-----------------------|
| 846 | LTBP1       | ↗                             | 4.3194466   | Ssc.8072.1.A1 at  | 100512100             |
| 847 | CHRD1       | ↗                             | 4.463381    | Ssc.11310.1.A1 at | 100521058             |
| 848 | TACSTD2     | ↗                             | 4.6750283   | Ssc.2627.2.S1 at  | 100510966             |
| 849 | LTBP1       | ↗                             | 4.693407    | Ssc.8072.2.A1 at  | 100512100             |
| 850 | THBS4       | ↗                             | 4.9116945   | Ssc.1411.1.S1 at  | 100513005             |
| 851 | ANGPTL4     | ↗                             | 5.260369    | Ssc.8980.1.A1 at  | 397628                |
| 852 | MGST2       | ↗                             | 5.350628    | Ssc.21635.1.A1 at | 100513365             |
| 853 | MKX         | ↗                             | 5.7160025   | Ssc.23899.1.A1 at | 100620286             |
| 854 | CSF2        | ↗                             | 5.7550044   | Ssc.382.1.S1 at   | 397208                |
| 855 | CSF3        | ↗                             | 5.769807    | Ssc.16151.1.S1 at | 100737548 /// 396839  |
| 856 | AUTS2       | ↗                             | 7.6464424   | Ssc.31175.1.S1 at | 100515476///100515305 |
| 857 | GPM6A       | ↗                             | 8.029271    | Ssc.14007.1.A1 at | 100511106             |
| 858 | TWIST1      | ↗                             | 8.346752    | Ssc.17121.1.S1 at | 100516456             |
| 859 | BCHE        | ↗                             | 8.569331    | Ssc.18164.1.A1 at | 100624138             |
| 860 | CHRD1       | ↗                             | 10.030324   | Ssc.13276.1.A1 at | 100521058             |
| 861 | PCOLCE      | ↗                             | 10.041028   | Ssc.1122.1.S1 at  | 100627524             |
| 862 | TMEFF2      | ↗                             | 10.662961   | Ssc.19235.1.A1 at | 654831                |
| 863 | NRXN3       | ↗                             | 11.1694355  | Ssc.24855.1.S1 at | 100620189             |
| 864 | BCHE        | ↗                             | 11.50771    | Ssc.31095.1.A1 at | 100624138             |
| 865 | TMEM158     | ↗                             | 16.815687   | Ssc.17364.1.S1 at | 100620777             |
| 866 | GABRA4      | ↗                             | 17.019104   | Ssc.8348.1.A1 at  | 100622712             |
| 867 | CHRD1       | ↗                             | 46.29664    | Ssc.11310.2.A1 at | 100521058             |

### Supplemental Table I

**List of genes that were differentially expressed at high and low WSS regions of the porcine aorta.** The EC transcriptome was studied at low and high WSS regions of the porcine aorta in 5 pigs using GeneChip® Porcine Genome Arrays (Affymetrix). Data were analysed using GeneSpring software GX 11 (Agilent). Genes that displayed significant fold enrichment between low and high WSS regions are listed. Green indicates decreased, whereas red indicates increased expression in low WSS compared to high WSS site.

| <b>Gene Ontology term</b>                     | <b>Number of Genes</b> | <b>Enrichment Score</b> |
|-----------------------------------------------|------------------------|-------------------------|
| regulation of apoptosis                       | 46                     | 2.38                    |
| heparin binding                               | 12                     | 1.9                     |
| ARID/BRIGHT DNA-binding domain                | 4                      | 1.77                    |
| regulation of actin cytoskeleton organisation | 8                      | 1.7                     |
| melanocyte differentiation                    | 4                      | 1.6                     |
| negative regulation of apoptosis              | 22                     | 1.59                    |
| collagen metabolic process                    | 5                      | 1.54                    |
| WD40 repeat                                   | 17                     | 1.52                    |
| mesenchymal cell differentiation              | 6                      | 1.39                    |
| cell migration                                | 18                     | 1.31                    |
| embryonic limb morphogenesis                  | 8                      | 1.25                    |
| Homeobox transcription factor                 | 15                     | 1.25                    |
| regulation of nucleotide metabolic process    | 9                      | 1.25                    |

## **Supplemental Table II**

**Functional annotation of differentially expressed genes.**

|    | Gene symbol    | Gene name                                                                 | Low vs High WSS | Zebrafish orthologue(s)                            | % aa id        |
|----|----------------|---------------------------------------------------------------------------|-----------------|----------------------------------------------------|----------------|
| 1  | <b>ANGPTL4</b> | Angiotensin-like 4                                                        | ↗               | <i>angptl4</i>                                     | 35             |
| 2  | <b>CCL2</b>    | Chemokine (C-C motif) ligand 2                                            | ↗               | NONE                                               | N/A            |
| 3  | <b>CD74</b>    | CD74 molecule, major histocompatibility complex, class II invariant chain | ↘               | <i>cd74a</i><br><i>cd74b</i>                       | 29<br>24       |
| 4  | <b>CDH13</b>   | Cadherin 13                                                               | ↘               | <i>cdh13</i>                                       | 61             |
| 5  | <b>CSF2</b>    | Colony stimulating factor 2 (granulocyte-macrophage)                      | ↗               | NONE                                               | N/A            |
| 6  | <b>FADD</b>    | Fas (TNFRSF6)-associated via death domain                                 | ↘               | <i>fadd</i>                                        | 34             |
| 7  | <b>IGF1</b>    | Insulin-like growth factor 1                                              | ↗               | <i>igf1</i>                                        | 54             |
| 8  | <b>JUN</b>     | Jun proto-oncogene                                                        | ↘               | <i>jun</i>                                         | 76             |
| 9  | <b>LGALS1</b>  | Lectin, galactoside-binding, soluble, 1                                   | ↗               | <i>lgals11</i><br><i>lgals12</i><br><i>lgals13</i> | 36<br>39<br>43 |
| 10 | <b>PDCD2L</b>  | Programmed cell death 2-like                                              | ↗               | <i>pcdcl2l</i>                                     | 40             |
| 11 | <b>PERP</b>    | p53 apoptosis effector related to PMP-22                                  | ↗               | <i>perp</i>                                        | 48             |
| 12 | <b>PTGIS</b>   | Prostaglandin I2 (prostacyclin) synthase                                  | ↘               | <i>ptgis</i>                                       | 48             |
| 13 | <b>TNFSF10</b> | Tumor necrosis factor (ligand) superfamily, member 10                     | ↘               | <i>tnfsf10</i>                                     | 38             |
| 14 | <b>TNIP1</b>   | TNFAIP3 interacting protein 1                                             | ↗               | <i>tnip1</i>                                       | 42             |

### Supplemental Table III

**Zebrafish orthologues of the mammalian apoptotic regulators studied.** Red indicates upregulation and green indicates downregulation of gene expression in low versus high WSS region of the pig aortic arch. Zebrafish orthologue(s) are listed for each gene with percentage identities on amino acid (% aa id) between mammalian and fish orthologues.

|    | GENE    | Serbanovic-Canic et al | Passerini et al |    | GENE    | Serbanovic-Canic et al | Civelek et al |    | GENE     | Serbanovic-Canic et al | Ni et al |
|----|---------|------------------------|-----------------|----|---------|------------------------|---------------|----|----------|------------------------|----------|
| 1  | ADORA3  | Down                   | Up              | 1  | ANGPTL4 | Up                     | Up            | 1  | ARHGAP25 | Down                   | Up       |
| 2  | AKAP7   | Down                   | Up              | 3  | CCL2    | Up                     | Up            | 2  | ARL4A    | Down                   | Down     |
| 3  | APOA1   | Up                     | Up              | 4  | COL3A1  | Up                     | Up            | 3  | CACHD1   | Up                     | Down     |
| 4  | BBS4    | Down                   | Up              | 5  | FBNP1   | Down                   | Down          | 4  | CD74     | Down                   | Up       |
| 5  | C1QTNF1 | Up                     | Up              | 6  | GRB2    | Down                   | Up            | 5  | CDC42EP5 | Up                     | Down     |
| 6  | CAMK2G  | Down                   | Down            | 7  | HNRPDL  | Up                     | Up            | 6  | CEP170   | Up                     | Up       |
| 7  | CCL2    | Up                     | Up              | 8  | LTBP1   | Up                     | Up            | 7  | DYNC112  | Down                   | Down     |
| 8  | CDH13   | Down                   | Down            | 9  | MASP1   | Up                     | Up            | 8  | EPAS1    | Up                     | Down     |
| 9  | COL5A1  | Up                     | Up              | 10 | PROM2   | Up                     | Up            | 9  | FZD4     | Up                     | Down     |
| 10 | COL6A1  | Up                     | Down            | 11 | PDCD2L  | Up                     | Up            | 10 | GJA5     | Down                   | Down     |
| 11 | DCTD    | Down                   | Down            | 12 | PROM2   | Up                     | Up            | 11 | GPM6A    | Up                     | Up       |
| 12 | FGF7    | Up                     | Down            | 13 | TMEM9   | Up                     | Up            | 12 | HOXA7    | Down                   | Down     |
| 13 | FXYD3   | Up                     | Down            | 14 | TRAPPC4 | Down                   | Up            | 13 | ITM2B    | Down                   | Down     |
| 14 | FZD8    | Down                   | Down            | 15 | UBQLN1  | Up                     | Up            | 14 | KIRREL3  | Up                     | Down     |
| 15 | GATA4   | Up                     | Up              | 16 | UGCG    | Up                     | Up            | 15 | PHACTR1  | Down                   | Up       |
| 16 | GPM6A   | Up                     | Up              |    |         |                        |               | 16 | PKHD1L1  | Up                     | Down     |
| 17 | GPX3    | Up                     | Up              |    |         |                        |               | 17 | PLEK2    | Up                     | Down     |
| 18 | HAND2   | Up                     | Up              |    |         |                        |               | 18 | PNPLA6   | Up                     | Down     |
| 19 | HDAC5   | Down                   | Down            |    |         |                        |               | 19 | SMAP2    | Down                   | Up       |
| 20 | HOXA7   | Down                   | Down            |    |         |                        |               | 20 | SORT1    | Down                   | Down     |
| 21 | HSPA8   | Up                     | Up              |    |         |                        |               | 21 | SP100    | Down                   | Down     |
| 22 | ISYNA1  | Up                     | Up              |    |         |                        |               | 22 | SULT1A1  | Up                     | Down     |
| 23 | JUN     | Down                   | Down            |    |         |                        |               | 23 | SYP      | Up                     | Down     |
| 24 | KCNH2   | Up                     | Up              |    |         |                        |               | 24 | TTC17    | Down                   | Down     |
| 25 | LGALS1  | Up                     | Up              |    |         |                        |               | 25 | WWP2     | Down                   | Down     |
| 26 | LTBP1   | Up                     | Up              |    |         |                        |               |    |          |                        |          |
| 27 | MAX     | Down                   | Down            |    |         |                        |               |    |          |                        |          |
| 28 | MFAP1   | Down                   | Down            |    |         |                        |               |    |          |                        |          |
| 29 | MGST2   | Up                     | Up              |    |         |                        |               |    |          |                        |          |
| 30 | MKRN2   | Down                   | Down            |    |         |                        |               |    |          |                        |          |
| 31 | MT1A    | Up                     | Up              |    |         |                        |               |    |          |                        |          |
| 32 | PDGFRA  | Up                     | Up              |    |         |                        |               |    |          |                        |          |
| 33 | PEG10   | Up                     | Up              |    |         |                        |               |    |          |                        |          |
| 34 | PFN2    | Up                     | Up              |    |         |                        |               |    |          |                        |          |
| 35 | PPFIBP1 | Up                     | Down            |    |         |                        |               |    |          |                        |          |
| 36 | SLIT2   | Up                     | Up              |    |         |                        |               |    |          |                        |          |
| 37 | STK38L  | Down                   | Down            |    |         |                        |               |    |          |                        |          |
| 38 | TACSTD2 | Up                     | Up              |    |         |                        |               |    |          |                        |          |
| 39 | THRB    | Up                     | Up              |    |         |                        |               |    |          |                        |          |
| 40 | UGP2    | Down                   | Down            |    |         |                        |               |    |          |                        |          |
| 41 | ZNF238  | Down                   | Down            |    |         |                        |               |    |          |                        |          |

#### Supplemental Table IV

**Comparison of microarray data with other *in vivo* microarray studies.** Genes found to be differentially expressed both in the current study (Serbanovic-Canic et al) and in published studies from Passerini 2004,<sup>13</sup> Civelek 2009<sup>14</sup> and Ni 2010<sup>15</sup> are listed. Red indicates upregulation at low WSS or athero-prone sites; green indicates downregulation at low WSS or athero-prone sites.



|    | GENE     | Serbanovic-Canic et al | Maimari et al |    | GENE     | Serbanovic-Canic et al | Maimari et al |
|----|----------|------------------------|---------------|----|----------|------------------------|---------------|
| 1  | ANGPTL4  | Up                     | Down          | 39 | MTAP     | Down                   | Up            |
| 2  | APLN     | Up                     | Up            | 40 | MYH10    | Up                     | Up            |
| 3  | APLNR    | Up                     | Down          | 41 | NAGA     | Down                   | Down          |
| 4  | ARSI     | Up                     | Up            | 42 | NPPC     | Up                     | Down          |
| 5  | ATP8A1   | Down                   | Down          | 43 | OAF      | Up                     | Down          |
| 6  | BCHE     | Up                     | Up            | 44 | OIP5     | Up                     | Up            |
| 7  | BDH1     | Up                     | Up            | 45 | PARP12   | Down                   | Up            |
| 8  | C13orf33 | Up                     | Down          | 46 | PDE4A    | Up                     | Down          |
| 9  | C1orf21  | Up                     | Down          | 47 | PLA1A    | Down                   | Down          |
| 10 | CALML4   | Down                   | Down          | 48 | PLEK2    | Up                     | Down          |
| 11 | CCL2     | Up                     | Up            | 49 | POC1A    | Down                   | Up            |
| 12 | CD79B    | Down                   | Down          | 50 | PSAT1    | Up                     | Up            |
| 13 | CHAF1A   | Down                   | Up            | 51 | RHOF     | Up                     | Down          |
| 14 | CHEK1    | Down                   | Up            | 52 | RNF144A  | Down                   | Up            |
| 15 | CHN1     | Up                     | Down          | 53 | RNF214   | Down                   | Down          |
| 16 | CHST3    | Up                     | Down          | 54 | ROGDI    | Up                     | Down          |
| 17 | COL5A1   | Up                     | Down          | 55 | SBNO2    | Up                     | Down          |
| 18 | COL6A1   | Up                     | Down          | 56 | SERPINB1 | Up                     | Down          |
| 19 | CORO2B   | Down                   | Up            | 57 | SFXN2    | Down                   | Up            |
| 20 | CSF3     | Up                     | Up            | 58 | SLC2A3   | Up                     | Down          |
| 21 | CXCL2    | Up                     | Up            | 59 | SLC7A7   | Up                     | Up            |
| 22 | CXXC5    | Up                     | Down          | 60 | SORT1    | Down                   | Up            |
| 23 | CYP2U1   | Down                   | Down          | 61 | SOS2     | Down                   | Down          |
| 24 | ELMO2    | Down                   | Down          | 62 | STK38L   | Down                   | Down          |
| 25 | ENO2     | Up                     | Down          | 63 | SULT1A1  | Up                     | Down          |
| 26 | EPAS1    | Up                     | Down          | 64 | TACSTD2  | Up                     | Up            |
| 27 | FLYWCH1  | Up                     | Down          | 65 | TFF1     | Up                     | Down          |
| 28 | GIMAP4   | Up                     | Up            | 66 | TMCC1    | Down                   | Down          |
| 29 | GJA5     | Down                   | Down          | 67 | TNFSF10  | Down                   | Up            |
| 30 | HDAC5    | Down                   | Down          | 68 | TRAP1    | Up                     | Up            |
| 31 | HIST1H1D | Down                   | Up            | 69 | TTC17    | Down                   | Down          |
| 32 | HYAL3    | Up                     | Down          | 70 | VEGFA    | Up                     | Down          |
| 33 | ITFG3    | Up                     | Down          | 71 | VRK1     | Down                   | Up            |
| 34 | KIFC1    | Up                     | Up            | 72 | WBP2     | Up                     | Down          |
| 35 | LIMCH1   | Down                   | Up            | 73 | ZDHHC17  | Down                   | Down          |
| 36 | LXN      | Down                   | Up            | 74 | ZFAND2B  | Down                   | Down          |
| 37 | MLYCD    | Up                     | Down          | 75 | ZFH3     | Down                   | Down          |
| 38 | MSN      | Up                     | Down          | 76 | ZNF22    | Up                     | Down          |

### Supplemental Table V

**Comparison of microarray data with *in vitro* microarray studies.** Genes found to be differentially expressed both in the current study (Serbanovic-Canic et al) and in the meta-analysis of published *in vitro* microarray studies (Maimari 2016)<sup>16</sup> are listed. Red indicates upregulation at low WSS or athero-prone sites; green indicates downregulation at low WSS or athero-prone sites.

| MO name            | Position | MO sequence (5'-3')       | MO dose used for functional study | Reference                          |
|--------------------|----------|---------------------------|-----------------------------------|------------------------------------|
| Control            | N/A      | CCTCTTACCTCAGTTACAATTTATA | 3 ng or 6 ng                      | Gene Tools standard control        |
| <i>angptl4</i>     | I2E3     | TCGTAATCTAAAGGACATCACATGA | 6 ng                              | This study                         |
| <i>angptl4</i> MO2 | E3I3     | TCAGCAATGATAAACTGACTTACCA | 6 ng                              | This study                         |
| <i>cd74a</i>       | E1I1     | AATCTACTCAATCACCTTGCATCAC | 3 ng                              | This study                         |
| <i>cd74b</i>       | E2I2     | GTGCTATGGTTTTCTGACCAGATTT | 6 ng                              | This study                         |
| <i>cdh13</i>       | E1I1     | GCACTGTAAACATCTTACCCTGAGT | 3 ng                              | This study                         |
| <i>cdh13</i> MO2   | E4I4     | TGTTAGGTCACAAAAGAGTACCTGT | 3 ng                              | This study                         |
| <i>fadd</i>        | I1E2     | TTGATTCTCTCTAAAAGAGACACA  | N/A                               | This study                         |
| <i>igf1</i>        | I1E2     | GTACACTGCATCCCAGAGAGAGGCA | N/A                               | This study                         |
| <i>jun</i>         | ATG      | TTCCATCTTGGTAGACATAGAAGGC | 3 ng                              | This study                         |
| <i>p53</i>         | ATG      | GCGCCATTGCTTTGCAAGAATTG   | 3 ng                              | (Langheinrich, Hennen et al. 2002) |
| <i>pdcd2l</i>      | E2I2     | TGAAATAACAGAATGCTACCTTTCT | 3 ng                              | This study                         |
| <i>pdcd2l</i> MO2  | I1E2     | AGGTCTGTGAAGACAGAATTACGC  | 6 ng                              | This study                         |
| <i>perp</i>        | E1I1     | CTGACTTTTACTTACAGAATCC    | 6 ng                              | This study                         |
| <i>perp</i> MO2    | ATG      | TCGATCCCACCCGGAACATTATGC  | 6 ng                              | This study                         |
| <i>ptgis</i>       | E2I2     | ATAACATGACCTTAGAACTCACTG  | 3 ng                              | This study                         |
| <i>sih</i> MO      | ATG      | CATGTTTGCTCTGATCTGACACGCA | 3 ng                              | (Sehnert, Huq et al. 2002)         |
| <i>tnfrsf10</i>    | E1I1     | TTAACTCCTCGGCCCTTACCGTCGA | N/A                               | This study                         |
| <i>tnip1</i>       | I3E4     | ATGACCTGAAGAGAGCCGCAACCAT | 3 ng                              | This study                         |

### Supplemental Table VI

**Morpholino sequences.** Morpholinos (MOs) were designed to bind to the ATG region (translation-blocking MOs) or junctions between introns (I) and exons (E) of targeted genes. MO targeting *p53*<sup>17</sup> and *sih* MO<sup>18</sup> have been previously published.

| Organism            | Gene            | Forward primer (5'-3') | Reverse primer (5'-3')  | Purpose |
|---------------------|-----------------|------------------------|-------------------------|---------|
| <i>Danio rerio</i>  | <i>angptl4</i>  | ATGCAAGGAGAGGGTTTGGGA  | GCCATTCTGATATGCCTGCC    | RT-PCR  |
| <i>Danio rerio</i>  | <i>angptl4</i>  | AACAGAACATCCGCATCAGG   | TCAGAGACAGTCGCTCGTTT    | qRT-PCR |
| <i>Danio rerio</i>  | <i>bact2</i>    | TGAAATGCCCCTGTTGTTG    | ATGGCGGGGTGTTGAAGGTC    | RT-PCR  |
| <i>Danio rerio</i>  | <i>bact2</i>    | AGCCATCCTTCTGGGTATG    | TGATCTCCTTCTGCATCCTG    | qRT-PCR |
| <i>Danio rerio</i>  | <i>cd74a</i>    | CCAGACCACCAAGACGATC    | CTGGTCAGAGCGTTGATGTG    | RT-PCR  |
| <i>Danio rerio</i>  | <i>cd74b</i>    | TCTAGCGAGGGAAACGAGAC   | CGGAATTAAGGGCCCAACAC    | RT-PCR  |
| <i>Danio rerio</i>  | <i>cdh13</i>    | GATGACTGTCTGGGAATGA    | AATGGAGCTCGCTGGTTCT     | RT-PCR  |
| <i>Danio rerio</i>  | <i>fadd</i>     | AGACCGAGAGTTGAAAGCGA   | CAGCGGTGAGGTTCTGTTG     | RT-PCR  |
| <i>Danio rerio</i>  | <i>fadd</i>     | ACGATTATGACAGGCAACGCT  | GCTGTGTTGATTCTCTCTCGC   | qRT-PCR |
| <i>Danio rerio</i>  | <i>igf1</i>     | GACATTGCCCGCATCTCATC   | AGATGGGGCTTAAACGTCCA    | RT-PCR  |
| <i>Danio rerio</i>  | <i>pdcd2l</i>   | ATGGCGACATCAATACACGA   | TCACTCTCTCCCTTCTCGT     | RT-PCR  |
| <i>Danio rerio</i>  | <i>perp</i>     | GGTGTGGGATCGACTACACG   | ATGAAGGGCAGCAGAGAGAC    | RT-PCR  |
| <i>Danio rerio</i>  | <i>perp</i>     | TCATGGAGTTCTTGGGCT     | TGATGAAGGCGAAGATGAGGA   | qRT-PCR |
| <i>Danio rerio</i>  | <i>ptgis</i>    | TCTGCTGGTGGGACTCTCTA   | ATAAGCAGCGGAGGTTGTT     | RT-PCR  |
| <i>Danio rerio</i>  | <i>tnfsf10</i>  | ACTTCAGCAACGCTTGTGCG   | CACTCGATCTCCACTTCCGA    | RT-PCR  |
| <i>Danio rerio</i>  | <i>tnip1</i>    | TGCCTCCAGTCTGTGATGG    | TGGTTGGGATTGGACTCTTCA   | RT-PCR  |
| <i>Danio rerio</i>  | <i>tnip1</i>    | CACACGGTCATGAAAAAGCT   | TCCCAGTCAAACAATCCCGA    | qRT-PCR |
| <i>Homo sapiens</i> | <i>ANGPTL4</i>  | GACCCTGAGGTCTTCCACAG   | CTTGTTGAAAGAGTTGCTGGA   | qRT-PCR |
| <i>Homo sapiens</i> | <i>CCL2</i>     | TCAAAGTGAAGCTCGCACTC   | ATTGATTGCATCTGGCTGAG    | qRT-PCR |
| <i>Homo sapiens</i> | <i>CD74</i>     | TGCAGAAATGCCACCAAGTAT  | TCAGCATTCTGGAGCAGGT     | qRT-PCR |
| <i>Homo sapiens</i> | <i>CDH13</i>    | TTCTGTTGTCAAACCATTGGA  | GGGTACGAGTGGGTCTTCAT    | qRT-PCR |
| <i>Homo sapiens</i> | <i>CSF2</i>     | CCCTGGGAGCATGTGAAT     | TTTCATTCTCTCAGCAGCA     | qRT-PCR |
| <i>Homo sapiens</i> | <i>FADD</i>     | GGAAGAAGACCTGTGTGCAG   | TTGGTGTCTGAGACTTTGAGC   | qRT-PCR |
| <i>Homo sapiens</i> | <i>HPRT</i>     | TTGGTCAGGCAGTATAATCC   | GGGCATATCCTACAACAAC     | qRT-PCR |
| <i>Homo sapiens</i> | <i>IGF1</i>     | TATTTCAACAAGCCACAGG    | TCCAGCCTCCTTAGATCACA    | qRT-PCR |
| <i>Homo sapiens</i> | <i>JUN</i>      | TTCTGCGTCTTAGGCTTCT    | ACGTCCTTCTCTTTGCGT      | qRT-PCR |
| <i>Homo sapiens</i> | <i>LGALS1</i>   | TCAATCATGGCTTGTGGTCT   | CACGAAGCTCTTAGCGTCAG    | qRT-PCR |
| <i>Homo sapiens</i> | <i>PDCD2L</i>   | GACTGGTGTGAAGGTGCTGA   | CGAGCAGTCCAGTCTACGTC    | qRT-PCR |
| <i>Homo sapiens</i> | <i>PERP</i>     | GCCAACCCTGCTGCATTA     | GAAGGCACAGCCAATCAGGA    | qRT-PCR |
| <i>Homo sapiens</i> | <i>PTGIS</i>    | GGCCAGGATGAAACTGACTC   | CACTGCATGGAGGTTGGTAT    | qRT-PCR |
| <i>Homo sapiens</i> | <i>TNFSF10</i>  | TGCTGATCGTATCTTCA      | AAGAAACAAGCAATGCCACTT   | qRT-PCR |
| <i>Homo sapiens</i> | <i>TNIP1</i>    | GAAGTGAACAAGCAGTGGGA   | GCAGCTCAGTATCTTCTGC     | qRT-PCR |
| <i>Sus scrofa</i>   | <i>ANGPTL4</i>  | ACTGCCAAGAGCTGTTGAAGA  | CCATCTGAGGTCTCTTGCAGTT  | qRT-PCR |
| <i>Sus scrofa</i>   | <i>ARHGAP25</i> | AGCAGAGTCCATCGTAAAA    | ACATGTAACCCTGTGGCTTCA   | qRT-PCR |
| <i>Sus scrofa</i>   | <i>B2M</i>      | TTCACTCCTAACGCTGTGGA   | GTGGTCTCGATCCCACTTAAC   | qRT-PCR |
| <i>Sus scrofa</i>   | <i>CCL2</i>     | TCACCTGCTGCTATACACTTAC | ATCACTGCTCTTTAGGACACTTG | qRT-PCR |
| <i>Sus scrofa</i>   | <i>CD74</i>     | TTTGAGCAAGATCGGGTTT    | GGTCATGTTGCCGTAATTGG    | qRT-PCR |
| <i>Sus scrofa</i>   | <i>CDH13</i>    | AGACATTGTCACCGTCGTGT   | TCCAGTCCAGCCATATCTTG    | qRT-PCR |
| <i>Sus scrofa</i>   | <i>CDKN2AIP</i> | TCCGAGGGGCTTCTCTGGA    | GCTGCACCGAAAAGGTGGCG    | qRT-PCR |
| <i>Sus scrofa</i>   | <i>CSF2</i>     | CAGCGGCTGTGATGAATGAA   | TTGTACAGTTTACAGCGAGT    | qRT-PCR |
| <i>Sus scrofa</i>   | <i>ERCC5</i>    | AGGCAATATGAAGATGAAGGG  | GCCGCTTCTTAGCTTGAAT     | qRT-PCR |
| <i>Sus scrofa</i>   | <i>FADD</i>     | GTCGGCCAGCTGTCAAGCA    | AGCGCAGTGTGCTCGGGACT    | qRT-PCR |
| <i>Sus scrofa</i>   | <i>HIF1A</i>    | CGAAGGGTTTCCCCTCCG     | CTAAGCGCTGGCTCCCTCCG    | qRT-PCR |
| <i>Sus scrofa</i>   | <i>IGF1</i>     | TGCACCCCTCAAGCCTGCCA   | TGAGCCTTGGGCATGTCCGT    | qRT-PCR |
| <i>Sus scrofa</i>   | <i>JUN</i>      | GAAAAGGAAGCTGGAGAGGAT  | CTGCTGCGTTAAGCATGAGTT   | qRT-PCR |
| <i>Sus scrofa</i>   | <i>LGALS1</i>   | AGACCTCACCATCAAGCTGC   | GCTTCACTCAAAGGCCACAC    | qRT-PCR |
| <i>Sus scrofa</i>   | <i>PDCD2L</i>   | AGCAAGCTAGCGCGGTTCC    | AGCGAACACGTCAGGAGCC     | qRT-PCR |
| <i>Sus scrofa</i>   | <i>PERP</i>     | TCCCCTGCGCTTCTCCCTT    | CAGCGCAGCATCTCGACGCT    | qRT-PCR |
| <i>Sus scrofa</i>   | <i>PTGIS</i>    | CCGCTAGCTTCTCACTAGG    | AGGAGGACGGTGACATACCT    | qRT-PCR |
| <i>Sus scrofa</i>   | <i>TAF9</i>     | CCACACTTGGCACCAACCCA   | GCTGGGACTGTGAAGTGGGC    | qRT-PCR |
| <i>Sus scrofa</i>   | <i>TNFSF10</i>  | CAGTCAGACCTGCCTGGACC   | ACACAGGGCTTGCAGGAGCA    | qRT-PCR |
| <i>Sus scrofa</i>   | <i>TNIP1</i>    | AGCCGCTCCATCACCTGCT    | GCTCTGGCTTGCCTGCGGG     | qRT-PCR |

**Supplemental Table VII**

| Antibody         | Type                  | Dilution | Application                              | Source;<br>catalogue number           |
|------------------|-----------------------|----------|------------------------------------------|---------------------------------------|
| Active caspase 3 | Rabbit polyclonal IgG | 1:200    | Zebrafish whole-mount immunofluorescence | R&D Systems; AF835                    |
| Active caspase 3 | Rabbit polyclonal IgG | 1:100    | HUVECs immunofluorescence                | Cell Signaling; 9661                  |
| CD31             | Rat polyclonal IgG    | 1:100    | <i>En face</i> staining of murine aorta  | BioLegend; 102514                     |
| CDH13            | Rabbit polyclonal IgG | 1:50     | <i>En face</i> staining of murine aorta  | Santa Cruz Biotechnology;<br>sc-7940  |
| PERP             | Rabbit polyclonal IgG | 1:50     | <i>En face</i> staining of murine aorta  | Santa Cruz Biotechnology;<br>sc-67184 |

**Supplemental Table VIII**  
**List of used antibodies.**
